# Supplementary material for: Establishment of a 12-gene expression signature to predict colon cancer prognosis
Source: PeerJ. 2018 Jun 14;6:e4942. doi: 10.7717/peerj.4942 (PMC6004299; doi:10.7717/peerj.4942)
Supplement: Table S1 [file peerj-06-4942-s003.xlsx]

## Sheet: 1stPhase_clinic - Copy - Copy
Supplementary Table XX Clinic information of TCGA patients enrolled in phase I training stage.
SampleID	Group	Predicted_recurrence_risk	Stage	pathologic_M	pathologic_N	pathologic_T	Residual_tumor	Microsattelite_status	OS_days	OS_IND	RFS_days	RFS_IND	History_of_neoadjuvant_treatment	Aditional_pharmaceutical_therapy	Radiation_therapy	Additional_radiation_therapy	followup_treatment_success	new_neoplasm_event_type	new_tumor_event_additional_surgery_procedure	new_tumor_event_after_initial_treatment	perineural_invasion_present	person_neoplasm_cancer_status	Postoperative_rx_tx	primary_lymph_node_presentation_assessment	Primary_therapy_outcome_success	residual_disease_post_new_tumor_event_margin_status	site_of_additional_surgery_new_tumor_event_mets	synchronous_colon_cancer_present	weight_kg	Age_at_initial_pathologic_diagnosis
TCGA-AA-3509-01	Internal_test	Low Risk	Stage II	M0	N0	T3	R0	MSS	1915	LIVING	1915	Relapse-free	No	NA	NO	NA	Complete Remission/Response	NA	NA	NO	NA	TUMOR FREE	NO	YES	Complete Remission/Response	NA	NA	NO	NA	54
TCGA-AD-6901-01	Internal_test	High Risk	Stage II	MX	N0	T3	NA	MSI-L	682	DECEASED	468	Relapse	No	NO	NO	YES	Progressive Disease	Metastatic	YES	YES	NA	WITH TUMOR	YES	YES	Complete Remission/Response	RX	Other	NO	69	78
TCGA-AY-A54L-01	Internal_test	High Risk	Stage I	M0	N0	T2	R0	MSI-L	525	LIVING	396	Relapse	No	YES	NO	NO	Partial Remission/Response	NA	NO	YES	NO	WITH TUMOR	NO	YES	Complete Remission/Response	NA	NA	NO	68	74
TCGA-AZ-4315-01	Internal_test	Low Risk	Stage IIA	M0	N0	T3	R0	MSS	1776	LIVING	1776	Relapse-free	No	NA	NO	NA	NA	NA	NA	NO	NO	TUMOR FREE	NO	YES	NA	NA	NA	NA	84	61
TCGA-AZ-6598-01	Internal_test	Low Risk	Stage II	MX	N0	T3	NA	MSI-H	1503	DECEASED	1503	Relapse-free	No	NA	NO	NA	Complete Remission/Response	NA	NA	NO	NO	TUMOR FREE	NO	YES	Complete Remission/Response	NA	NA	NA	NA	77
TCGA-CM-5862-01	Internal_test	High Risk	Stage IVA	M1a	N1a	T3	R0	MSS	153	DECEASED	31	Relapse	No	NO	NO	NO	NA	NA	NO	YES	NO	WITH TUMOR	NO	YES	NA	NA	NA	NO	77.6	80
TCGA-D5-5537-01	Internal_test	High Risk	Stage IIA	MX	N2	T3	RX	MSS	1381	DECEASED	722	Relapse	No	YES	NO	YES	Progressive Disease	NA	NO	YES	NO	WITH TUMOR	NO	YES	Complete Remission/Response	NA	NA	NO	75	83
TCGA-D5-6536-01	Internal_test	High Risk	Stage IIA	M0	N0	T3	R0	MSS	543	LIVING	493	Relapse	No	NO	NO	NO	NA	Locoregional Disease	YES	YES	YES	WITH TUMOR	NO	YES	NA	R2	NA	YES	83	73
TCGA-D5-6537-01	Internal_test	High Risk	Stage IIIB	MX	N1a	T3	R0	MSS	146	DECEASED	123	Relapse	No	NO	NO	NO	NA	NA	NO	YES	YES	WITH TUMOR	NO	YES	NA	NA	Liver	NA	80	64
TCGA-DM-A0XF-01	Internal_test	Low Risk	Stage IIIC	M0	N2	T3	NA	MSI-L	1162	DECEASED	1162	Relapse-free	No	NA	NA	NA	NA	NA	NA	NO	NA	NA	NA	YES	NA	NA	NA	NO	85	68
TCGA-F4-6460-01	Internal_test	High Risk	Stage IIIB	M0	N1	T3	R0	MSS	407	LIVING	313	Relapse	No	YES	NO	NO	NA	NA	NO	YES	NO	WITH TUMOR	YES	YES	NA	NA	Liver	NO	73	51
TCGA-F4-6806-01	Internal_test	High Risk	Stage I	M0	N0	T2	R0	MSS	481	LIVING	336	Relapse	No	YES	NO	NO	Complete Remission/Response	Metastatic	YES	YES	NO	TUMOR FREE	YES	YES	Complete Remission/Response	R0	Liver	NO	70	59
TCGA-G4-6293-01	Internal_test	Low Risk	Stage III	M0	N1	T3	R0	MSI-L	3275	LIVING	3275	Relapse-free	No	NA	NO	NA	NA	NA	NA	NO	NO	TUMOR FREE	YES	YES	NA	NA	NA	NO	64.5	49
TCGA-G4-6298-01	Internal_test	High Risk	Stage IIIB	MX	N1	T4a	R0	MSI-L	715	DECEASED	291	Relapse	No	YES	NO	NO	NA	NA	NO	YES	YES	WITH TUMOR	NO	YES	NA	NA	NA	NO	59.4	90
TCGA-G4-6304-01	Internal_test	High Risk	Stage IIB	M0	N0	T4	R0	MSI-H	1631	LIVING	859	Relapse	No	YES	NO	YES	NA	NA	NO	YES	NO	TUMOR FREE	YES	NO	NA	NA	NA	NO	57	66
TCGA-G4-6309-01	Internal_test	Low Risk	Stage IIIB	M0	N1	T3	R0	MSI-H	1574	LIVING	1574	Relapse-free	No	NA	NO	NA	NA	NA	NA	NO	NO	TUMOR FREE	YES	YES	NA	NA	NA	NO	65.4	40
TCGA-G4-6310-01	Internal_test	Low Risk	Stage IIIB	M0	N1	T3	R0	MSS	1372	LIVING	1372	Relapse-free	No	NA	YES	NA	NA	NA	NA	NO	NO	TUMOR FREE	YES	YES	NA	NA	NA	YES	102.5	69
TCGA-G4-6625-01	Internal_test	Low Risk	Stage IIA	M0	N0	T3	R0	MSS	2792	LIVING	2564	Relapse	No	NO	NO	YES	NA	NA	NO	YES	NO	TUMOR FREE	NO	YES	NA	NA	NA	NO	65.5	77
TCGA-QG-A5YV-01	Internal_test	Low Risk	Stage IIIC	MX	N1a	T4b	R0	MSS	1301	LIVING	1301	Relapse-free	No	NA	NO	NA	Complete Remission/Response	NA	NA	NO	NO	TUMOR FREE	YES	YES	Complete Remission/Response	NA	NA	NO	109.226	64
TCGA-WS-AB45-01	Internal_test	Low Risk	Stage IIA	MX	N0	T3	RX	MSI-H	2130	LIVING	2130	Relapse-free	No	NA	NO	NA	Complete Remission/Response	NA	NA	NO	NO	TUMOR FREE	NO	YES	Complete Remission/Response	NA	NA	NO	34	52
TCGA-A6-2682-01	Training	High Risk	Stage IV	M1	N1	T4b	R0	MSS	424	DECEASED	381	Relapse	No	NO	NO	NO	NA	NA	NO	YES	NA	WITH TUMOR	YES	YES	NA	NA	NA	NO	96.5	70
TCGA-A6-4105-01	Training	High Risk	Stage IIA	M0	N0	T3	NA	MSS	442	DECEASED	364	Relapse	No	NA	NO	NA	NA	NA	NO	YES	NA	TUMOR FREE	NO	YES	NA	NA	NA	NO	83.3	79
TCGA-A6-5664-01	Training	High Risk	Stage IIIC	MX	N2a	T4a	NA	MSS	362	LIVING	183	Relapse	No	YES	NO	NO	NA	NA	NO	YES	NA	WITH TUMOR	NO	YES	NA	NA	NA	NO	70.3	80
TCGA-A6-A565-01	Training	High Risk	Stage IIIC	MX	N2	T3	RX	MSI-L	494	DECEASED	439	Relapse	No	YES	NO	NO	Progressive Disease	NA	NO	YES	NA	WITH TUMOR	YES	YES	Progressive Disease	NA	NA	NO	66.7	34
TCGA-A6-A566-01	Training	High Risk	Stage IIIB	M0	N1	T4	R0	MSI-L	758	DECEASED	257	Relapse	No	YES	NO	YES	Progressive Disease	NA	NO	YES	NA	WITH TUMOR	YES	YES	Progressive Disease	NA	NA	NO	66.1	55
TCGA-A6-A567-01	Training	High Risk	Stage IV	M1	N1	T3	NA	MSS	1881	DECEASED	1069	Relapse	No	YES	NO	NO	Progressive Disease	Metastatic	YES	YES	NA	WITH TUMOR	NO	YES	NA	NA	Liver	NO	84	56
TCGA-A6-A56B-01	Training	Low Risk	Stage IIIB	M0	N1	T3	R0	MSS	1711	DECEASED	1678	Relapse	No	NO	NO	NO	NA	NA	NO	YES	NA	TUMOR FREE	YES	YES	Complete Remission/Response	NA	NA	NO	77.2	57
TCGA-AA-3495-01	Training	Low Risk	Stage I	M0	N0	T2	R0	MSS	1127	LIVING	1127	Relapse-free	No	NA	NO	NA	Complete Remission/Response	NA	NA	NO	NA	TUMOR FREE	NO	YES	Complete Remission/Response	NA	NA	NO	NA	79
TCGA-AA-3511-01	Training	High Risk	Stage II	M0	N0	T4	R0	MSS	212	LIVING	59	Relapse	No	NA	NO	NA	Complete Remission/Response	NA	NO	YES	NA	TUMOR FREE	NO	YES	Complete Remission/Response	NA	NA	NO	NA	64
TCGA-AA-3655-01	Training	Low Risk	Stage II	M0	N0	T3	R0	MSS	1856	LIVING	1856	Relapse-free	No	NA	NO	NA	Complete Remission/Response	NA	NA	NO	NA	TUMOR FREE	NO	YES	Complete Remission/Response	NA	NA	NO	NA	68
TCGA-AA-3660-01	Training	Low Risk	Stage II	M0	N0	T3	R0	MSS	2375	LIVING	2375	Relapse-free	No	NA	NO	NA	Complete Remission/Response	NA	NA	NO	NA	TUMOR FREE	NO	YES	Complete Remission/Response	NA	NA	NO	NA	51
TCGA-AA-3675-01	Training	Low Risk	Stage II	M0	N0	T3	R0	MSS	1431	LIVING	1431	Relapse-free	No	NA	NO	NA	Complete Remission/Response	NA	NA	NO	NA	TUMOR FREE	NO	YES	Complete Remission/Response	NA	NA	NO	NA	84
TCGA-AA-3685-01	Training	Low Risk	Stage II	M0	N0	T3	R0	MSS	1127	LIVING	1127	Relapse-free	No	NA	NO	NA	Complete Remission/Response	NA	NA	NO	NA	TUMOR FREE	NO	YES	Complete Remission/Response	NA	NA	NO	NA	69
TCGA-AA-A01P-01	Training	High Risk	Stage III	M0	N1	T3	R0	MSI-H	1158	DECEASED	762	Relapse	No	NA	NO	NA	NA	NA	NO	YES	NA	WITH TUMOR	NO	YES	NA	NA	NA	NO	NA	80
TCGA-AA-A01X-01	Training	High Risk	Stage III	M0	N1	T2	RX	MSS	791	LIVING	791	Relapse	No	NA	NO	NA	NA	NA	NO	YES	NA	WITH TUMOR	NO	YES	NA	NA	NA	NO	NA	80
TCGA-AA-A01Z-01	Training	Low Risk	Stage II	M0	N0	T3	R0	MSS	1126	LIVING	1126	Relapse	No	NA	NO	NA	Progressive Disease	NA	NO	YES	NA	WITH TUMOR	NO	YES	Progressive Disease	NA	NA	NO	NA	68
TCGA-AA-A02K-01	Training	High Risk	Stage IV	M1	N2	T4	R2	MSS	426	DECEASED	306	Relapse	No	NA	NO	NA	Progressive Disease	NA	NO	YES	NA	WITH TUMOR	YES	YES	Progressive Disease	NA	NA	NO	NA	50
TCGA-AA-A02Y-01	Training	Low Risk	Stage I	M0	N0	T2	R0	MSS	1216	LIVING	1216	Relapse-free	No	NA	NO	NA	Complete Remission/Response	NA	NA	NO	NA	TUMOR FREE	NO	YES	Complete Remission/Response	NA	NA	NO	NA	73
TCGA-AD-6964-01	Training	High Risk	Stage II	NA	N2b	T4a	NA	MSI-H	331	DECEASED	325	Relapse	No	NO	NO	NO	Progressive Disease	Metastatic	YES	YES	NA	WITH TUMOR	YES	YES	Progressive Disease	RX	Other	NO	91	58
TCGA-AZ-4313-01	Training	Low Risk	Stage I	M0	N0	T1	NA	MSI-H	1532	LIVING	1532	Relapse-free	No	NA	NO	NA	NA	NA	NA	NO	NO	TUMOR FREE	NO	YES	NA	NA	NA	NA	57	51
TCGA-AZ-4684-01	Training	High Risk	Stage IVA	M1	N2	T3	NA	MSI-L	1977	LIVING	411	Relapse	No	YES	NO	NO	NA	NA	NO	YES	NA	WITH TUMOR	NO	YES	NA	NA	Liver	YES	94	49
TCGA-AZ-5403-01	Training	High Risk	Stage II	MX	N0	T3	NA	MSS	1910	DECEASED	304	Relapse	No	YES	NO	NO	NA	NA	NO	YES	YES	WITH TUMOR	NO	YES	NA	NA	NA	NA	NA	43
TCGA-AZ-5407-01	Training	Low Risk	Stage I	M0	N0	T1	NA	MSS	1868	LIVING	1868	Relapse-free	No	NA	NO	NA	NA	NA	NA	NO	NA	TUMOR FREE	NO	YES	NA	NA	NA	YES	NA	51
TCGA-AZ-6601-01	Training	Low Risk	Stage II	M0	N0	T3	NA	MSI-H	3042	DECEASED	2270	Relapse	No	NO	NO	NO	Progressive Disease	Locoregional Disease	YES	YES	YES	WITH TUMOR	NO	YES	Progressive Disease	R0	NA	NA	59	68
TCGA-CK-4947-01	Training	High Risk	Stage IVA	M0	N1	T4a	RX	MSS	534	LIVING	21	Relapse	No	YES	NO	NO	NA	NA	NO	YES	NA	WITH TUMOR	NO	YES	NA	NA	NA	NO	NA	46
TCGA-CK-4948-01	Training	Low Risk	Stage IIIA	M0	N1	T3	R0	MSI-L	3116	LIVING	3116	Relapse-free	No	NA	NO	NA	NA	NA	NA	NO	NA	TUMOR FREE	NO	YES	NA	NA	NA	NO	NA	45
TCGA-CK-4950-01	Training	Low Risk	Stage IIIA	M0	N1	T3	R1	MSS	1227	LIVING	1227	Relapse-free	No	NA	NO	NA	NA	NA	NA	NO	NO	WITH TUMOR	YES	YES	NA	NA	NA	NO	NA	68
TCGA-CK-4951-01	Training	High Risk	Stage IIA	M0	N0	T3	R1	MSI-H	2134	DECEASED	480	Relapse	No	NO	NO	NO	NA	Locoregional Disease	YES	YES	NO	TUMOR FREE	NO	YES	NA	NA	NA	NO	NA	79
TCGA-CK-5912-01	Training	Low Risk	Stage I	MX	N0	T2	RX	MSS	1493	DECEASED	1493	Relapse-free	No	NA	NO	NA	NA	NA	NA	NO	NO	TUMOR FREE	NO	NA	Complete Remission/Response	NA	NA	NO	NA	81
TCGA-CK-5913-01	Training	Low Risk	Stage IIA	MX	N0	T3	RX	MSI-H	1561	LIVING	1561	Relapse-free	No	NA	NO	NA	Complete Remission/Response	NA	NA	NO	NO	TUMOR FREE	NO	NA	Complete Remission/Response	NA	NA	NO	NA	58
TCGA-CK-5916-01	Training	High Risk	Stage I	M0	N0	T1	RX	MSI-H	643	DECEASED	292	Relapse	No	YES	NO	NO	Progressive Disease	NA	NO	YES	NO	WITH TUMOR	NO	NA	Progressive Disease	NA	NA	NO	NA	71
TCGA-CK-6751-01	Training	Low Risk	Stage I	MX	N0	T2	RX	MSS	3780	LIVING	3780	Relapse-free	No	NA	NO	NA	NA	NA	NA	NO	NO	TUMOR FREE	NO	NA	NA	NA	NA	NO	NA	88
TCGA-CM-5861-01	Training	High Risk	Stage IIA	M0	N0	T3	R0	MSI-H	335	LIVING	335	Relapse	No	NO	NO	NO	NA	Locoregional Disease	YES	YES	YES	TUMOR FREE	NO	YES	NA	R0	NA	NO	122	63
TCGA-D5-5539-01	Training	High Risk	Stage IIIA	M0	N1	T3	R0	MSS	596	LIVING	579	Relapse	No	NO	NO	NO	NA	NA	NO	YES	NA	WITH TUMOR	YES	YES	NA	NA	NA	NO	83	60
TCGA-D5-6529-01	Training	High Risk	Stage IIA	M0	N0	T3	R0	MSI-L	614	LIVING	386	Relapse	No	YES	NO	NO	NA	NA	NO	YES	YES	WITH TUMOR	NO	YES	NA	NA	Liver	NA	106	69
TCGA-D5-6534-01	Training	Low Risk	Stage IIA	M0	N0	T3	R0	MSS	1316	LIVING	1316	Relapse-free	No	NA	NO	NA	Complete Remission/Response	NA	NA	NO	YES	TUMOR FREE	NO	YES	Complete Remission/Response	NA	NA	NA	94	62
TCGA-DM-A0X9-01	Training	Low Risk	Stage IIA	M0	N0	T3	NA	MSS	3641	LIVING	3641	Relapse-free	No	NA	NA	NA	NA	NA	NA	NO	NA	NA	NA	YES	NA	NA	NA	NO	86	71
TCGA-DM-A0XD-01	Training	High Risk	Stage IIA	M0	N0	T3	NA	MSI-L	743	DECEASED	484	Relapse	No	NA	NA	NO	NA	NA	NO	YES	NA	NA	NA	YES	NA	NA	NA	NO	62	65
TCGA-DM-A1D0-01	Training	Low Risk	Stage IIA	M0	N0	T3	NA	MSS	3974	LIVING	3974	Relapse-free	No	NA	NA	NA	NA	NA	NA	NO	NA	NA	NA	YES	NA	NA	NA	NO	65	79
TCGA-DM-A1D4-01	Training	Low Risk	Stage IIA	M0	N0	T3	NA	MSI-L	2821	DECEASED	1920	Relapse	No	NA	NA	NO	NA	NA	NO	YES	NA	NA	NA	YES	NA	NA	NA	NO	59	80
TCGA-DM-A1D6-01	Training	Low Risk	Stage IIA	M0	N0	T3	NA	MSS	1518	DECEASED	1518	Relapse-free	No	NA	NA	NA	NA	NA	NA	NO	NA	NA	NA	YES	NA	NA	NA	NO	80	88
TCGA-DM-A1D7-01	Training	High Risk	Stage IIA	M0	N0	T3	NA	MSS	405	DECEASED	80	Relapse	No	NA	NA	NO	NA	NA	NO	YES	NA	NA	NA	YES	NA	NA	NA	NO	75	82
TCGA-DM-A1D9-01	Training	Low Risk	Stage IIA	M0	N0	T3	NA	MSS	4270	LIVING	4270	Relapse-free	No	NA	NA	NA	NA	NA	NA	NO	NA	NA	NA	YES	NA	NA	NA	NO	98	67
TCGA-DM-A1DB-01	Training	Low Risk	Stage IIA	M0	N0	T3	NA	MSS	1348	DECEASED	1348	Relapse-free	No	NA	NA	NA	NA	NA	NA	NO	NA	NA	NA	YES	NA	NA	NA	NO	75	68
TCGA-DM-A1HA-01	Training	Low Risk	Stage IIIC	M0	N2	T3	NA	MSS	4000	LIVING	4000	Relapse-free	No	NA	NA	NA	NA	NA	NA	NO	NA	NA	NA	YES	NA	NA	NA	NO	67	82
TCGA-DM-A1HB-01	Training	Low Risk	Stage IIIB	M0	N1	T3	NA	MSI-H	4126	LIVING	4126	Relapse-free	No	NA	NA	NA	NA	NA	NA	NO	NA	NA	NA	YES	NA	NA	NA	NO	70	75
TCGA-DM-A282-01	Training	Low Risk	Stage IIA	M0	N0	T3	NA	MSS	4233	LIVING	4233	Relapse-free	No	NA	NA	NA	NA	NA	NA	NO	NA	NA	NA	YES	NA	NA	NA	NO	44	60
TCGA-DM-A288-01	Training	High Risk	Stage IIIC	M0	N2	T3	NA	MSS	427	DECEASED	320	Relapse	No	NA	NA	YES	NA	NA	NO	YES	NA	NA	NA	YES	NA	NA	NA	NO	85	68
TCGA-DM-A28C-01	Training	Low Risk	Stage IIA	M0	N0	T3	NA	MSS	2475	DECEASED	1929	Relapse	No	NA	NA	NO	NA	NA	NO	YES	NA	NA	NA	YES	NA	NA	NA	NO	70	74
TCGA-DM-A28E-01	Training	Low Risk	Stage IIA	M0	N0	T3	NA	MSS	3648	LIVING	3648	Relapse-free	No	NA	NA	NA	NA	NA	NA	NO	NA	NA	NA	YES	NA	NA	NA	NO	75	72
TCGA-DM-A28G-01	Training	Low Risk	Stage IIA	M0	N0	T3	NA	MSS	1849	DECEASED	1849	Relapse-free	No	NA	NA	NA	NA	NA	NA	NO	NA	NA	NA	YES	NA	NA	NA	NO	90	75
TCGA-DM-A28H-01	Training	High Risk	Stage IIIC	M0	N2	T3	NA	MSI-L	3561	LIVING	484	Relapse	No	NA	NA	YES	NA	Locoregional Disease	YES	YES	NA	NA	NA	YES	NA	NA	NA	NO	87	50
TCGA-DM-A28K-01	Training	Low Risk	Stage IIA	M0	N0	T3	NA	MSS	2988	LIVING	2988	Relapse-free	No	NA	NA	NA	NA	NA	NA	NO	NA	NA	NA	YES	NA	NA	NA	NO	78	75
TCGA-DM-A28M-01	Training	Low Risk	Stage IIA	M0	N0	T3	NA	MSS	2895	LIVING	2895	Relapse-free	No	NA	NA	NA	NA	NA	NA	NO	NA	NA	NA	YES	NA	NA	NA	NO	90	63
TCGA-F4-6461-01	Training	High Risk	Stage IIIC	M0	N2	T4b	R0	MSS	338	DECEASED	288	Relapse	No	NA	NO	NA	NA	NA	NO	YES	NO	WITH TUMOR	NO	YES	NA	NA	NA	NO	57	41
TCGA-G4-6294-01	Training	High Risk	Stage IV	M1	N1	T3	R0	MSS	858	DECEASED	517	Relapse	No	YES	NO	NO	NA	NA	NO	YES	NO	WITH TUMOR	YES	YES	NA	NA	NA	NO	47.5	75
TCGA-G4-6297-01	Training	High Risk	Stage IV	M1	N2	T3	R0	MSS	2506	LIVING	439	Relapse	No	YES	NO	NO	NA	NA	NO	YES	YES	WITH TUMOR	YES	YES	NA	NA	NA	NO	64	55
TCGA-G4-6299-01	Training	Low Risk	Stage IIIC	M0	N2	T3	R0	MSS	2268	LIVING	2268	Relapse-free	No	NA	NO	NA	NA	NA	NA	NO	NO	TUMOR FREE	YES	YES	NA	NA	NA	NO	88	69
TCGA-G4-6302-01	Training	Low Risk	Stage IIA	M0	N0	T3	R0	MSI-H	2047	DECEASED	2047	Relapse-free	No	NA	NO	NA	NA	NA	NA	NO	YES	TUMOR FREE	NO	YES	NA	NA	NA	NO	57	90
TCGA-G4-6303-01	Training	High Risk	Stage IV	M1	N1	T3	R0	MSI-L	2003	DECEASED	872	Relapse	No	YES	NO	NO	NA	NA	NO	YES	NO	WITH TUMOR	NO	YES	NA	NA	NA	NO	69	54
TCGA-G4-6306-01	Training	Low Risk	Stage IIA	M0	N0	T2	R0	MSS	1359	LIVING	1359	Relapse-free	No	NA	NO	NA	NA	NA	NA	NO	NO	TUMOR FREE	NO	YES	NA	NA	NA	NO	110	71
TCGA-G4-6307-01	Training	Low Risk	Stage IIIB	M0	N1	T3	R0	MSS	1674	LIVING	1674	Relapse-free	No	NA	NO	NA	NA	NA	NA	NO	NO	TUMOR FREE	YES	YES	NA	NA	NA	NO	71	37
TCGA-G4-6311-01	Training	Low Risk	Stage III	MX	N1	T3	R0	MSS	1199	LIVING	1199	Relapse-free	No	NA	NO	NA	NA	NA	NA	NO	YES	TUMOR FREE	YES	YES	NA	NA	NA	NO	69.9	80
TCGA-G4-6314-01	Training	High Risk	Stage IV	M1	N2	T3	R0	MSS	1093	LIVING	38	Relapse	No	YES	NO	YES	NA	NA	NO	YES	NO	WITH TUMOR	YES	YES	NA	NA	NA	NO	84.1	76
TCGA-G4-6315-01	Training	Low Risk	Stage IV	M1	N1	T3	R0	MSS	1117	LIVING	1117	Relapse-free	No	NA	NO	NA	NA	NA	NA	NO	YES	TUMOR FREE	YES	YES	NA	NA	NA	NO	58	66
TCGA-G4-6317-01	Training	High Risk	Stage IIIC	MX	N2	T3	R0	MSI-L	1095	LIVING	592	Relapse	No	NO	NO	NO	NA	Metastatic	YES	YES	NO	TUMOR FREE	YES	YES	NA	NA	Liver	NO	95.3	51
TCGA-G4-6322-01	Training	High Risk	Stage IIIB	MX	N1	T3	R0	MSI-L	792	LIVING	789	Relapse	No	NO	NO	NO	NA	NA	NO	YES	NO	WITH TUMOR	YES	YES	NA	NA	NA	NA	90.9	65
TCGA-G4-6626-01	Training	Low Risk	Stage IIA	M0	N0	T3	R0	MSS	1422	DECEASED	1422	Relapse-free	No	NA	NO	NA	NA	NA	NA	NO	NO	TUMOR FREE	NO	YES	NA	NA	NA	NO	59	90
TCGA-G4-6627-01	Training	High Risk	Stage IIA	M0	N0	T3	R0	MSI-L	1434	LIVING	1003	Relapse	No	YES	NO	NA	NA	NA	NO	YES	NO	TUMOR FREE	NO	YES	NA	NA	NA	NO	80	84
TCGA-G4-6628-01	Training	Low Risk	Stage I	M0	N0	T2	R0	MSI-H	1595	LIVING	1595	Relapse-free	No	NA	NO	NA	NA	NA	NA	NO	NO	TUMOR FREE	NO	YES	NA	NA	NA	NO	91	78
TCGA-NH-A6GA-01	Training	High Risk	Stage IIIC	MX	N2a	T4a	R0	MSS	302	DECEASED	6	Relapse	No	NO	NO	NO	Progressive Disease	NA	NO	YES	NO	WITH TUMOR	YES	YES	Progressive Disease	NA	NA	NO	92	58
