# Supplementary material for: Establishment of a 12-gene expression signature to predict colon cancer prognosis
Source: PeerJ. 2018 Jun 14;6:e4942. doi: 10.7717/peerj.4942 (PMC6004299; doi:10.7717/peerj.4942)
Supplement: Table S2 [file peerj-06-4942-s004.xlsx]

## Sheet: Suppl Table NEW
Supplementary Table XX Clinic information of TCGA patients enrolled in phase II training stage.
sampleID	Group	Predicted_recurrence_risk	Stage	pathologic_M	pathologic_N	pathologic_T	Residual_tumor	Microsattelite_status	OS_days	OS_IND	RFS_days	RFS_IND	History_of_neoadjuvant_treatment	Aditional_pharmaceutical_therapy	Radiation_therapy	Additional_radiation_therapy	followup_treatment_success	new_neoplasm_event_type	new_tumor_event_additional_surgery_procedure	new_tumor_event_after_initial_treatment	perineural_invasion_present	person_neoplasm_cancer_status	Postoperative_rx_tx	primary_lymph_node_presentation_assessment	Primary_therapy_outcome_success	residual_disease_post_new_tumor_event_margin_status	site_of_additional_surgery_new_tumor_event_mets	synchronous_colon_cancer_present	weight_kg	Age_at_initial_pathologic_diagnosis
TCGA-A6-A565-01	Internal_test	High risk	Stage IIIC	MX	N2	T3	RX	MSI-L	494	DECEASED	439	Relapse	No	YES	NO	NO	Progressive Disease	NA	NO	YES	NA	WITH TUMOR	YES	YES	Progressive Disease	NA	NA	NO	66.7	34
TCGA-CM-5863-01	Internal_test	High risk	Stage IIIB	M0	N1b	T3	R0	MSS	304	LIVING	304	Relapse-free	No	NA	NO	NA	NA	NA	NA	NO	YES	TUMOR FREE	YES	YES	NA	NA	NA	NO	103.4	60
TCGA-A6-4105-01	Internal_test	High risk	Stage IIA	M0	N0	T3	NA	MSS	442	DECEASED	364	Relapse	No	NA	NO	NA	NA	NA	NO	YES	NA	TUMOR FREE	NO	YES	NA	NA	NA	NO	83.3	79
TCGA-AA-A01X-01	Internal_test	High risk	Stage III	M0	N1	T2	RX	MSS	791	LIVING	791	Relapse	No	NA	NO	NA	NA	NA	NO	YES	NA	WITH TUMOR	NO	YES	NA	NA	NA	NO	NA	80
TCGA-D5-6532-01	Internal_test	High risk	Stage IIA	M0	N0	T3	R0	MSI-L	555	LIVING	555	Relapse-free	No	NA	NO	NA	NA	NA	NA	NO	NO	TUMOR FREE	NO	YES	NA	NA	NA	NA	92	61
TCGA-AY-A8YK-01	Internal_test	High risk	Stage IVA	M1	N2a	T3	R0	MSS	209	LIVING	209	Relapse-free	No	NA	NO	NA	NA	NA	NA	NO	NO	TUMOR FREE	YES	YES	Complete Remission/Response	NA	NA	NO	86.1	44
TCGA-DM-A0XD-01	Internal_test	High risk	Stage IIA	M0	N0	T3	NA	MSI-L	743	DECEASED	484	Relapse	No	NA	NA	NO	NA	NA	NO	YES	NA	NA	NA	YES	NA	NA	NA	NO	62	65
TCGA-NH-A8F8-01	Internal_test	High risk	Stage IV	M1	N2b	T4a	R0	MSS	365	LIVING	365	Relapse-free	No	NA	NO	NA	NA	NA	NA	NO	NO	NA	YES	YES	NA	NA	NA	NO	74	79
TCGA-F4-6463-01	Internal_test	High risk	Stage IIA	M0	N0	T3	R0	MSS	415	LIVING	415	Relapse-free	No	NA	NO	NA	NA	NA	NA	NO	NO	TUMOR FREE	NO	YES	NA	NA	NA	NO	62	51
TCGA-3L-AA1B-01	Internal_test	High risk	Stage I	M0	N0	T2	R0	MSS	349	LIVING	349	Relapse-free	No	NA	NO	NA	NA	NA	NA	NO	NO	TUMOR FREE	NO	YES	Complete Remission/Response	NA	NA	NO	63.3	61
TCGA-A6-A5ZU-01	Internal_test	High risk	Stage IIIB	M0	N1	T3	RX	MSS	293	LIVING	293	Relapse-free	No	NA	NO	NA	Complete Remission/Response	NA	NA	NO	NA	TUMOR FREE	YES	YES	Complete Remission/Response	NA	NA	NO	99.1	59
TCGA-AZ-6605-01	Internal_test	High risk	Stage IIIB	M0	N1	T4	NA	MSS	159	DECEASED	159	Relapse-free	No	NA	NO	NA	Stable Disease	NA	NA	NO	NO	TUMOR FREE	YES	YES	Stable Disease	NA	NA	NA	NA	77
TCGA-WS-AB45-01	Internal_test	High risk	Stage IIA	MX	N0	T3	RX	MSI-H	2130	LIVING	2130	Relapse-free	No	NA	NO	NA	Complete Remission/Response	NA	NA	NO	NO	TUMOR FREE	NO	YES	Complete Remission/Response	NA	NA	NO	34	52
TCGA-F4-6806-01	Internal_test	High risk	Stage I	M0	N0	T2	R0	MSS	481	LIVING	336	Relapse	No	YES	NO	NO	Complete Remission/Response	Metastatic	YES	YES	NO	TUMOR FREE	YES	YES	Complete Remission/Response	R0	Liver	NO	70	59
TCGA-A6-2682-01	Internal_test	High risk	Stage IV	M1	N1	T4b	R0	MSS	424	DECEASED	381	Relapse	No	NO	NO	NO	NA	NA	NO	YES	NA	WITH TUMOR	YES	YES	NA	NA	NA	NO	96.5	70
TCGA-AA-3511-01	Internal_test	High risk	Stage II	M0	N0	T4	R0	MSS	212	LIVING	59	Relapse	No	NA	NO	NA	Complete Remission/Response	NA	NO	YES	NA	TUMOR FREE	NO	YES	Complete Remission/Response	NA	NA	NO	NA	64
TCGA-D5-6928-01	Internal_test	High risk	Stage IIA	M0	N0	T3	R0	MSI-H	354	LIVING	354	Relapse-free	No	NA	NO	NA	NA	NA	NA	NO	NO	TUMOR FREE	NO	YES	NA	NA	NA	NO	93	80
TCGA-DM-A285-01	Internal_test	High risk	Stage IV	M1	N2	T3	NA	MSS	186	DECEASED	186	Relapse-free	No	NA	NA	NA	NA	NA	NA	NO	NA	NA	NA	YES	NA	NA	NA	NO	72	71
TCGA-CK-6748-01	Internal_test	High risk	Stage IV	M1	N1	T3	RX	MSS	61	LIVING	61	Relapse-free	No	NA	NO	NA	NA	NA	NA	NO	NO	TUMOR FREE	NO	NA	NA	NA	NA	NO	NA	45
TCGA-A6-6649-01	Internal_test	High risk	Stage IIIB	M0	N1b	T3	NA	MSS	328	LIVING	328	Relapse-free	No	NA	NO	NA	NA	NA	NA	NO	YES	TUMOR FREE	YES	YES	NA	NA	NA	NO	106	66
TCGA-CM-5344-01	Internal_test	High risk	Stage IIIB	M0	N1b	T3	R0	MSS	304	LIVING	304	Relapse-free	No	NA	NO	NA	NA	NA	NA	NO	YES	TUMOR FREE	YES	YES	NA	NA	NA	NO	64.9	39
TCGA-CM-6171-01	Internal_test	High risk	Stage I	M0	N0	T2	R0	MSI-H	182	LIVING	182	Relapse-free	No	NA	NO	NA	NA	NA	NA	NO	NO	TUMOR FREE	NO	YES	NA	NA	NA	NO	71.2	77
TCGA-NH-A6GB-01	Internal_test	High risk	Stage IIIC	MX	N2b	T3	R0	MSS	476	LIVING	476	Relapse-free	No	NA	NO	NA	Progressive Disease	NA	NA	NO	NO	WITH TUMOR	YES	YES	Progressive Disease	NA	NA	NO	83	71
TCGA-D5-5538-01	Internal_test	High risk	Stage IIIB	M0	N1b	T3	R0	MSS	373	LIVING	373	Relapse-free	No	NA	NO	NA	NA	NA	NA	NO	NO	TUMOR FREE	YES	YES	NA	NA	NA	NO	70	60
TCGA-D5-7000-01	Internal_test	High risk	Stage I	M0	N0	T2	R0	MSS	312	LIVING	312	Relapse-free	No	NA	NO	NA	NA	NA	NA	NO	NO	TUMOR FREE	NO	YES	NA	NA	NA	NO	60	79
TCGA-AZ-6607-01	Internal_test	High risk	Stage IV	M1	N2	T4	NA	MSS	97	DECEASED	97	Relapse-free	No	NA	NO	NA	Progressive Disease	NA	NA	NO	YES	WITH TUMOR	NO	NO	Complete Remission/Response	NA	NA	NA	NA	69
TCGA-D5-5540-01	Internal_test	High risk	Stage IIA	M0	N0	T3	R0	MSI-L	411	LIVING	411	Relapse-free	No	NA	NO	NA	NA	NA	NA	NO	NO	TUMOR FREE	NO	YES	NA	NA	NA	NO	83	73
TCGA-CM-5864-01	Internal_test	High risk	Stage I	M0	N0	T2	R0	MSS	61	LIVING	61	Relapse-free	No	NA	NO	NA	NA	NA	NA	NO	NO	TUMOR FREE	NO	YES	NA	NA	NA	NO	103	60
TCGA-CM-5348-01	Internal_test	High risk	Stage IIIB	M0	N1a	T3	R0	MSS	393	LIVING	393	Relapse-free	No	NA	NO	NA	NA	NA	NA	NO	YES	TUMOR FREE	NO	YES	NA	NA	NA	NO	85.5	72
TCGA-AZ-4684-01	Internal_test	High risk	Stage IVA	M1	N2	T3	NA	MSI-L	1977	LIVING	411	Relapse	No	YES	NO	NO	NA	NA	NO	YES	NA	WITH TUMOR	NO	YES	NA	NA	Liver	YES	94	49
TCGA-D5-5539-01	Internal_test	High risk	Stage IIIA	M0	N1	T3	R0	MSS	596	LIVING	579	Relapse	No	NO	NO	NO	NA	NA	NO	YES	NA	WITH TUMOR	YES	YES	NA	NA	NA	NO	83	60
TCGA-AA-3663-01	Internal_test	High risk	Stage II	M0	N0	T3	R0	MSI-H	212	LIVING	212	Relapse-free	No	NA	NO	NA	Complete Remission/Response	NA	NA	NO	NA	TUMOR FREE	NO	YES	Complete Remission/Response	NA	NA	NO	NA	42
TCGA-CK-4947-01	Internal_test	High risk	Stage IVA	M0	N1	T4a	RX	MSS	534	LIVING	21	Relapse	No	YES	NO	NO	NA	NA	NO	YES	NA	WITH TUMOR	NO	YES	NA	NA	NA	NO	NA	46
TCGA-NH-A50T-01	Internal_test	High risk	Stage IIA	MX	N0	T3	R0	MSS	553	LIVING	553	Relapse-free	No	NA	NO	NA	Complete Remission/Response	NA	NA	NO	NO	TUMOR FREE	NO	YES	Complete Remission/Response	NA	NA	NA	73.5	68
TCGA-AA-3509-01	Internal_test	High risk	Stage II	M0	N0	T3	R0	MSS	1915	LIVING	1915	Relapse-free	No	NA	NO	NA	Complete Remission/Response	NA	NA	NO	NA	TUMOR FREE	NO	YES	Complete Remission/Response	NA	NA	NO	NA	54
TCGA-AZ-4615-01	Internal_test	High risk	Stage IIIB	M0	N1	T3	RX	MSI-H	1002	LIVING	1002	Relapse-free	No	NA	NO	NO	NA	NA	NO	NO	NO	WITH TUMOR	YES	YES	NA	NA	Liver	YES	84	84
TCGA-A6-A566-01	Internal_test	High risk	Stage IIIB	M0	N1	T4	R0	MSI-L	758	DECEASED	257	Relapse	No	YES	NO	YES	Progressive Disease	NA	NO	YES	NA	WITH TUMOR	YES	YES	Progressive Disease	NA	NA	NO	66.1	55
TCGA-D5-6929-01	Internal_test	High risk	Stage IV	M1	N1	T3	R0	MSI-L	408	LIVING	408	Relapse-free	No	NA	NO	NA	NA	NA	NA	NO	YES	TUMOR FREE	YES	YES	NA	NA	NA	NO	80	49
TCGA-CM-6168-01	Internal_test	High risk	Stage IIA	M0	N0	T3	R0	MSI-L	181	LIVING	181	Relapse-free	No	NA	NO	NA	NA	NA	NA	NO	NO	TUMOR FREE	NO	YES	NA	NA	NA	NO	52.5	84
TCGA-CM-6166-01	Internal_test	High risk	Stage I	M0	N0	T2	R0	MSS	424	LIVING	424	Relapse-free	No	NA	NO	NA	NA	NA	NA	NO	NO	TUMOR FREE	NO	YES	NA	NA	NA	NO	45	48
TCGA-AA-A02K-01	Training	High risk	Stage IV	M1	N2	T4	R2	MSS	426	DECEASED	306	Relapse	No	NA	NO	NA	Progressive Disease	NA	NO	YES	NA	WITH TUMOR	YES	YES	Progressive Disease	NA	NA	NO	NA	50
TCGA-CM-6170-01	Training	High risk	Stage I	M0	N0	T2	R0	MSS	242	LIVING	242	Relapse-free	No	NA	NO	NA	NA	NA	NA	NO	NO	TUMOR FREE	NO	YES	NA	NA	NA	NO	85.8	73
TCGA-F4-6459-01	Training	High risk	Stage IIIB	M0	N2a	T3	R0	MSS	262	DECEASED	262	Relapse-free	No	NA	NO	NA	NA	NA	NA	NO	NO	TUMOR FREE	NO	YES	NA	NA	NA	NO	55	61
TCGA-A6-2684-01	Training	High risk	Stage I	M0	N0	T2	R0	MSI-L	387	LIVING	387	Relapse-free	No	YES	NO	YES	NA	Locoregional Disease	YES	NO	NA	TUMOR FREE	NO	YES	NA	NA	NA	NO	70.1	75
TCGA-AD-6548-01	Training	High risk	Stage I	M0	N0	T2	R0	MSI-L	650	LIVING	650	Relapse-free	No	NA	NO	NA	Complete Remission/Response	NA	NA	NO	NA	TUMOR FREE	NO	YES	Complete Remission/Response	NA	NA	NO	78.6	81
TCGA-A6-2685-01	Training	High risk	Stage IIA	M0	N0	T3	R0	MSS	464	LIVING	464	Relapse-free	No	YES	NO	NO	NA	Locoregional Disease	YES	NO	NA	TUMOR FREE	NO	YES	NA	R0	NA	NO	77.3	48
TCGA-D5-6529-01	Training	High risk	Stage IIA	M0	N0	T3	R0	MSI-L	614	LIVING	386	Relapse	No	YES	NO	NO	NA	NA	NO	YES	YES	WITH TUMOR	NO	YES	NA	NA	Liver	NA	106	69
TCGA-CM-6165-01	Training	High risk	Stage IIA	M0	N0	T3	R0	MSS	212	LIVING	212	Relapse-free	No	NA	NO	NA	NA	NA	NA	NO	NO	TUMOR FREE	NO	YES	NA	NA	NA	NO	100.7	74
TCGA-G4-6303-01	Training	High risk	Stage IV	M1	N1	T3	R0	MSI-L	2003	DECEASED	872	Relapse	No	YES	NO	NO	NA	NA	NO	YES	NO	WITH TUMOR	NO	YES	NA	NA	NA	NO	69	54
TCGA-A6-A567-01	Training	High risk	Stage IV	M1	N1	T3	NA	MSS	1881	DECEASED	1069	Relapse	No	YES	NO	NO	Progressive Disease	Metastatic	YES	YES	NA	WITH TUMOR	NO	YES	NA	NA	Liver	NO	84	56
TCGA-CM-5862-01	Training	High risk	Stage IVA	M1a	N1a	T3	R0	MSS	153	DECEASED	31	Relapse	No	NO	NO	NO	NA	NA	NO	YES	NO	WITH TUMOR	NO	YES	NA	NA	NA	NO	77.6	80
TCGA-CM-5860-01	Training	High risk	Stage IIA	M0	N0	T3	R0	MSS	304	LIVING	304	Relapse-free	No	NA	NO	NA	NA	NA	NA	NO	YES	TUMOR FREE	YES	YES	NA	NA	NA	NO	100.7	44
TCGA-A6-6782-01	Training	High risk	Stage IIB	MX	N0	T4a	NA	MSS	189	LIVING	189	Relapse-free	No	NA	NO	NA	NA	NA	NA	NO	YES	TUMOR FREE	NO	YES	NA	NA	NA	NO	63.2	82
TCGA-D5-6541-01	Training	High risk	Stage IIA	M0	N0	T3	R0	MSS	474	LIVING	474	Relapse-free	No	NA	NO	NA	NA	NA	NA	NO	NO	TUMOR FREE	NO	YES	NA	NA	NA	NO	85	49
TCGA-D5-6537-01	Training	High risk	Stage IIIB	MX	N1a	T3	R0	MSS	146	DECEASED	123	Relapse	No	NO	NO	NO	NA	NA	NO	YES	YES	WITH TUMOR	NO	YES	NA	NA	Liver	NA	80	64
TCGA-CM-6172-01	Training	High risk	Stage IIIB	M0	N1a	T3	R0	MSS	212	LIVING	212	Relapse-free	No	NA	NO	NA	NA	NA	NA	NO	NO	TUMOR FREE	YES	YES	NA	NA	NA	NO	77.6	70
TCGA-CM-6162-01	Training	High risk	Stage IIIB	M0	N1a	T3	R0	MSI-H	212	LIVING	212	Relapse-free	No	NA	NO	NA	NA	NA	NA	NO	YES	TUMOR FREE	YES	YES	NA	NA	NA	NO	109	48
TCGA-G4-6298-01	Training	High risk	Stage IIIB	MX	N1	T4a	R0	MSI-L	715	DECEASED	291	Relapse	No	YES	NO	NO	NA	NA	NO	YES	YES	WITH TUMOR	NO	YES	NA	NA	NA	NO	59.4	90
TCGA-CM-6163-01	Training	High risk	Stage I	M0	N0	T1	R0	MSS	427	LIVING	427	Relapse-free	No	NA	NO	NA	NA	NA	NA	NO	YES	TUMOR FREE	NO	YES	NA	NA	NA	NO	75.8	74
TCGA-NH-A6GA-01	Training	High risk	Stage IIIC	MX	N2a	T4a	R0	MSS	302	DECEASED	6	Relapse	No	NO	NO	NO	Progressive Disease	NA	NO	YES	NO	WITH TUMOR	YES	YES	Progressive Disease	NA	NA	NO	92	58
TCGA-F4-6460-01	Training	High risk	Stage IIIB	M0	N1	T3	R0	MSS	407	LIVING	313	Relapse	No	YES	NO	NO	NA	NA	NO	YES	NO	WITH TUMOR	YES	YES	NA	NA	Liver	NO	73	51
TCGA-CM-6161-01	Training	High risk	Stage I	M0	N0	T2	R0	MSI-L	212	LIVING	212	Relapse-free	No	NA	NO	NA	NA	NA	NA	NO	NO	TUMOR FREE	NO	YES	NA	NA	NA	NO	65.6	36
TCGA-G4-6302-01	Training	High risk	Stage IIA	M0	N0	T3	R0	MSI-H	2047	DECEASED	2047	Relapse-free	No	NA	NO	NA	NA	NA	NA	NO	YES	TUMOR FREE	NO	YES	NA	NA	NA	NO	57	90
TCGA-DM-A0XF-01	Training	High risk	Stage IIIC	M0	N2	T3	NA	MSI-L	1162	DECEASED	1162	Relapse-free	No	NA	NA	NA	NA	NA	NA	NO	NA	NA	NA	YES	NA	NA	NA	NO	85	68
TCGA-CK-4951-01	Training	High risk	Stage IIA	M0	N0	T3	R1	MSI-H	2134	DECEASED	480	Relapse	No	NO	NO	NO	NA	Locoregional Disease	YES	YES	NO	TUMOR FREE	NO	YES	NA	NA	NA	NO	NA	79
TCGA-A6-6654-01	Training	High risk	Stage IIIB	M0	N1	T3	NA	MSS	399	LIVING	399	Relapse-free	No	NA	NO	NA	NA	NA	NA	NO	NA	TUMOR FREE	YES	YES	NA	NA	NA	NO	97.4	65
TCGA-AA-3662-01	Training	High risk	Stage IV	M1	N2	T4	R2	MSS	184	LIVING	184	Relapse-free	No	NA	NO	NA	Partial Remission/Response	NA	NA	NO	NA	WITH TUMOR	YES	YES	Partial Remission/Response	NA	NA	NO	NA	80
TCGA-A6-5657-01	Training	High risk	Stage IIIB	M0	N1	T3	R0	MSS	367	LIVING	367	Relapse-free	No	NA	NO	NA	NA	NA	NA	NO	NA	TUMOR FREE	YES	YES	NA	NA	NA	NO	99.6	65
TCGA-D5-6924-01	Training	High risk	Stage IIA	M0	N0	T3	R0	MSS	435	LIVING	435	Relapse-free	No	NA	NO	NA	NA	NA	NA	NO	NO	TUMOR FREE	NO	YES	NA	NA	NA	NO	85	68
TCGA-CM-6167-01	Training	High risk	Stage IIIC	M0	N2b	T3	R0	MSS	122	LIVING	122	Relapse-free	No	NA	NO	NA	NA	NA	NA	NO	YES	TUMOR FREE	YES	YES	NA	NA	NA	NO	89	57
TCGA-A6-5662-01	Training	High risk	Stage IVA	M1	N2	T3	NA	MSS	453	LIVING	453	Relapse-free	No	YES	NO	NO	NA	NA	NO	NO	NA	WITH TUMOR	YES	YES	NA	NA	NA	NO	84.4	46
TCGA-AY-A69D-01	Training	High risk	Stage IIA	M0	N0	T3	R0	MSI-L	543	LIVING	543	Relapse-free	No	NA	NO	NA	Complete Remission/Response	NA	NA	NO	NO	TUMOR FREE	NO	YES	Complete Remission/Response	NA	NA	NO	103	55
TCGA-CM-6169-01	Training	High risk	Stage IIA	M0	N0	T3	R0	MSS	243	LIVING	243	Relapse-free	No	NA	NO	NA	NA	NA	NA	NO	YES	TUMOR FREE	YES	YES	NA	NA	NA	NO	109.3	67
TCGA-A6-6650-01	Training	High risk	Stage IIA	M0	N0	T3	NA	MSS	278	LIVING	278	Relapse-free	No	NA	NO	NA	NA	NA	NA	NO	NA	TUMOR FREE	NO	YES	NA	NA	NA	NO	94.7	69
TCGA-QG-A5Z2-01	Training	High risk	Stage I	M0	N0	T2	R0	MSI-H	952	LIVING	952	Relapse-free	No	NA	NO	NA	Complete Remission/Response	NA	NA	NO	NO	TUMOR FREE	NO	YES	Complete Remission/Response	NA	NA	NO	97.5	61
TCGA-AA-3495-01	Training	High risk	Stage I	M0	N0	T2	R0	MSS	1127	LIVING	1127	Relapse-free	No	NA	NO	NA	Complete Remission/Response	NA	NA	NO	NA	TUMOR FREE	NO	YES	Complete Remission/Response	NA	NA	NO	NA	79
TCGA-F4-6807-01	Training	High risk	Stage IIIC	M0	N2b	T3	R0	MSS	494	LIVING	494	Relapse-free	No	NA	NO	NA	Complete Remission/Response	NA	NA	NO	NO	TUMOR FREE	YES	YES	Complete Remission/Response	NA	NA	NO	57	51
TCGA-A6-6142-01	Training	High risk	Stage IVA	M1a	N1a	T3	NA	MSS	368	LIVING	368	Relapse-free	No	NA	NO	NA	NA	NA	NO	NO	NA	TUMOR FREE	YES	YES	NA	NA	NA	NO	88	56
TCGA-CM-6678-01	Training	High risk	Stage IVA	M1a	N1c	T4a	R0	MSS	122	LIVING	122	Relapse-free	No	YES	NO	NO	NA	Metastatic	YES	NO	NO	TUMOR FREE	YES	YES	NA	NA	Liver	NO	59	63
TCGA-AZ-6603-01	Training	High risk	Stage II	MX	N1	T2	NA	MSS	899	DECEASED	899	Relapse-free	No	NA	NO	NA	Complete Remission/Response	NA	NA	NO	NO	TUMOR FREE	NO	YES	Complete Remission/Response	NA	NA	NA	NA	77
TCGA-A6-6651-01	Training	High risk	Stage IIIB	MX	N1b	T3	NA	MSS	259	LIVING	259	Relapse-free	No	NA	NO	NA	NA	NA	NA	NO	NA	TUMOR FREE	YES	YES	NA	NA	NA	NO	88.5	55
TCGA-G4-6294-01	Training	High risk	Stage IV	M1	N1	T3	R0	MSS	858	DECEASED	517	Relapse	No	YES	NO	NO	NA	NA	NO	YES	NO	WITH TUMOR	YES	YES	NA	NA	NA	NO	47.5	75
TCGA-D5-6536-01	Training	High risk	Stage IIA	M0	N0	T3	R0	MSS	543	LIVING	493	Relapse	No	NO	NO	NO	NA	Locoregional Disease	YES	YES	YES	WITH TUMOR	NO	YES	NA	R2	NA	YES	83	73
TCGA-D5-6534-01	Training	High risk	Stage IIA	M0	N0	T3	R0	MSS	1316	LIVING	1316	Relapse-free	No	NA	NO	NA	Complete Remission/Response	NA	NA	NO	YES	TUMOR FREE	NO	YES	Complete Remission/Response	NA	NA	NA	94	62
TCGA-A6-6652-01	Training	High risk	Stage IVA	M1	N0	T3	NA	MSS	456	LIVING	456	Relapse-free	No	NA	NO	NA	NA	NA	NA	NO	NA	WITH TUMOR	YES	YES	NA	NA	NA	NO	137.6	59
TCGA-AZ-4323-01	Training	High risk	Stage IV	M1	N2	T4	NA	MSI-L	43	DECEASED	43	Relapse-free	No	NA	NO	NA	NA	NA	NA	NO	NA	WITH TUMOR	YES	YES	NA	NA	NA	NA	NA	37
TCGA-G4-6297-01	Training	High risk	Stage IV	M1	N2	T3	R0	MSS	2506	LIVING	439	Relapse	No	YES	NO	NO	NA	NA	NO	YES	YES	WITH TUMOR	YES	YES	NA	NA	NA	NO	64	55
TCGA-G4-6627-01	Training	High risk	Stage IIA	M0	N0	T3	R0	MSI-L	1434	LIVING	1003	Relapse	No	YES	NO	NA	NA	NA	NO	YES	NO	TUMOR FREE	NO	YES	NA	NA	NA	NO	80	84
TCGA-AZ-5403-01	Training	High risk	Stage II	MX	N0	T3	NA	MSS	1910	DECEASED	304	Relapse	No	YES	NO	NO	NA	NA	NO	YES	YES	WITH TUMOR	NO	YES	NA	NA	NA	NA	NA	43
TCGA-A6-2686-01	Training	High risk	Stage IIA	M0	N0	T3	R0	MSI-H	488	LIVING	488	Relapse-free	No	NA	NO	NA	NA	NA	NA	NO	NA	TUMOR FREE	NO	YES	NA	NA	NA	NO	61.4	81
TCGA-CK-4950-01	Training	High risk	Stage IIIA	M0	N1	T3	R1	MSS	1227	LIVING	1227	Relapse-free	No	NA	NO	NA	NA	NA	NA	NO	NO	WITH TUMOR	YES	YES	NA	NA	NA	NO	NA	68
TCGA-D5-6538-01	Training	High risk	Stage IIIB	M0	N2	T3	R0	MSI-L	521	LIVING	521	Relapse-free	No	NA	NO	NA	NA	NA	NA	NO	NO	TUMOR FREE	YES	YES	NA	NA	NA	NO	57	79
TCGA-CA-5256-01	Training	High risk	Stage IIA	M0	N0	T3	R0	MSS	65	LIVING	65	Relapse-free	No	NA	NO	NA	NA	NA	NA	NO	NA	TUMOR FREE	NO	NO	NA	NA	NA	NO	52	54
TCGA-G4-6323-01	Training	High risk	Stage IA	MX	N0	Tis	R0	MSS	419	LIVING	419	Relapse-free	No	NA	NO	NA	NA	NA	NA	NO	NO	TUMOR FREE	NO	YES	NA	NA	NA	NO	88.4	50
TCGA-DM-A1D7-01	Training	High risk	Stage IIA	M0	N0	T3	NA	MSS	405	DECEASED	80	Relapse	No	NA	NA	NO	NA	NA	NO	YES	NA	NA	NA	YES	NA	NA	NA	NO	75	82
TCGA-F4-6461-01	Training	High risk	Stage IIIC	M0	N2	T4b	R0	MSS	338	DECEASED	288	Relapse	No	NA	NO	NA	NA	NA	NO	YES	NO	WITH TUMOR	NO	YES	NA	NA	NA	NO	57	41
TCGA-CM-5861-01	Training	High risk	Stage IIA	M0	N0	T3	R0	MSI-H	335	LIVING	335	Relapse	No	NO	NO	NO	NA	Locoregional Disease	YES	YES	YES	TUMOR FREE	NO	YES	NA	R0	NA	NO	122	63
TCGA-A6-5664-01	Training	High risk	Stage IIIC	MX	N2a	T4a	NA	MSS	362	LIVING	183	Relapse	No	YES	NO	NO	NA	NA	NO	YES	NA	WITH TUMOR	NO	YES	NA	NA	NA	NO	70.3	80
TCGA-F4-6703-01	Training	High risk	Stage IIA	M0	N0	T3	R0	MSI-H	1091	LIVING	1091	Relapse-free	No	NA	NO	NA	Complete Remission/Response	NA	NA	NO	NO	TUMOR FREE	NO	YES	Complete Remission/Response	NA	NA	NO	84	64
TCGA-D5-6535-01	Training	High risk	Stage IIIB	MX	N1	T3	RX	MSS	460	LIVING	460	Relapse-free	No	NA	NO	NA	NA	NA	NA	NO	YES	TUMOR FREE	NO	YES	NA	NA	NA	NA	65	80
TCGA-AY-5543-01	Training	High risk	Stage IVA	M1	N1a	T3	R0	MSS	479	LIVING	479	Relapse-free	No	NA	NO	NA	NA	NA	NA	NO	NO	TUMOR FREE	YES	YES	NA	NA	NA	NO	61.3	65
TCGA-CK-5913-01	Internal_test	Low risk	Stage IIA	MX	N0	T3	RX	MSI-H	1561	LIVING	1561	Relapse-free	No	NA	NO	NA	Complete Remission/Response	NA	NA	NO	NO	TUMOR FREE	NO	NA	Complete Remission/Response	NA	NA	NO	NA	58
TCGA-A6-5661-01	Internal_test	Low risk	Stage IIA	M0	N0	T3	R0	MSI-H	306	LIVING	306	Relapse-free	No	NA	NO	NA	NA	NA	NA	NO	NA	TUMOR FREE	NO	YES	NA	NA	NA	NO	69.1	80
TCGA-QG-A5Z1-01	Internal_test	Low risk	Stage IIIB	MX	N1b	T3	R0	MSI-L	256	DECEASED	256	Relapse-free	No	NA	NO	NA	NA	NA	NA	NO	YES	TUMOR FREE	NO	YES	NA	NA	NA	NO	91.1	71
TCGA-CK-4952-01	Internal_test	Low risk	Stage III	M0	N2	T4	RX	MSS	475	LIVING	475	Relapse-free	No	NA	NO	NA	NA	NA	NA	NO	NO	TUMOR FREE	NO	YES	NA	NA	NA	NO	NA	48
TCGA-CM-6676-01	Internal_test	Low risk	Stage I	M0	N0	T2	R0	MSI-L	153	LIVING	153	Relapse-free	No	NA	NO	NA	NA	NA	NA	NO	NO	TUMOR FREE	NO	YES	NA	NA	NA	NO	100	82
TCGA-A6-6780-01	Internal_test	Low risk	Stage IIA	MX	N0	T3	NA	MSI-H	354	LIVING	354	Relapse-free	No	NA	NO	NA	NA	NA	NA	NO	NA	TUMOR FREE	NO	YES	NA	NA	NA	NO	64.1	74
TCGA-A6-A56B-01	Internal_test	Low risk	Stage IIIB	M0	N1	T3	R0	MSS	1711	DECEASED	1678	Relapse	No	NO	NO	NO	NA	NA	NO	YES	NA	TUMOR FREE	YES	YES	Complete Remission/Response	NA	NA	NO	77.2	57
TCGA-D5-6932-01	Internal_test	Low risk	Stage IIA	M0	N0	T3	R0	MSS	346	LIVING	346	Relapse-free	No	NA	NO	NA	NA	NA	NA	NO	YES	TUMOR FREE	NO	YES	NA	NA	NA	YES	75	69
TCGA-CK-5916-01	Internal_test	Low risk	Stage I	M0	N0	T1	RX	MSI-H	643	DECEASED	292	Relapse	No	YES	NO	NO	Progressive Disease	NA	NO	YES	NO	WITH TUMOR	NO	NA	Progressive Disease	NA	NA	NO	NA	71
TCGA-QL-A97D-01	Internal_test	Low risk	Stage I	MX	N0	T2	NA	MSS	295	LIVING	295	Relapse-free	No	NA	NA	NA	NA	NA	NA	NO	NA	TUMOR FREE	NA	YES	NA	NA	NA	NA	NA	84
TCGA-A6-5667-01	Internal_test	Low risk	Stage IIIB	MX	N1a	T3	R0	MSS	320	LIVING	320	Relapse-free	No	NA	NO	NA	NA	NA	NA	NO	NA	TUMOR FREE	YES	YES	NA	NA	NA	NO	76	40
TCGA-D5-6530-01	Internal_test	Low risk	Stage I	M0	N0	T2	R0	MSI-H	621	LIVING	621	Relapse-free	No	NA	NO	NA	NA	NA	NA	NO	YES	TUMOR FREE	NO	YES	NA	NA	NA	NA	89	53
TCGA-AZ-5407-01	Internal_test	Low risk	Stage I	M0	N0	T1	NA	MSS	1868	LIVING	1868	Relapse-free	No	NA	NO	NA	NA	NA	NA	NO	NA	TUMOR FREE	NO	YES	NA	NA	NA	YES	NA	51
TCGA-AY-6197-01	Internal_test	Low risk	Stage IIA	NA	N0	T3	R0	MSI-H	423	LIVING	423	Relapse-free	No	NA	NO	NA	NA	NA	NA	NO	NO	TUMOR FREE	NO	YES	NA	NA	NA	NO	158	60
TCGA-CK-4948-01	Internal_test	Low risk	Stage IIIA	M0	N1	T3	R0	MSI-L	3116	LIVING	3116	Relapse-free	No	NA	NO	NA	NA	NA	NA	NO	NA	TUMOR FREE	NO	YES	NA	NA	NA	NO	NA	45
TCGA-NH-A6GC-01	Internal_test	Low risk	Stage IVB	M1b	N1b	T4b	R0	MSS	389	LIVING	389	Relapse-free	No	NA	NO	NA	NA	NA	NA	NO	NO	NA	YES	YES	NA	NA	NA	NO	107	66
TCGA-A6-5666-01	Internal_test	Low risk	Stage IIC	M0	N0	T4b	NA	MSI-L	362	LIVING	362	Relapse-free	No	NO	NO	NO	NA	NA	NO	NO	NA	TUMOR FREE	NO	YES	NA	NA	NA	NO	95.4	78
TCGA-A6-6137-01	Internal_test	Low risk	Stage IIIB	M0	N1c	T3	NA	MSS	348	LIVING	348	Relapse-free	No	NA	NO	NA	NA	NA	NA	NO	NA	TUMOR FREE	YES	YES	NA	NA	NA	NO	93	55
TCGA-DM-A1D9-01	Internal_test	Low risk	Stage IIA	M0	N0	T3	NA	MSS	4270	LIVING	4270	Relapse-free	No	NA	NA	NA	NA	NA	NA	NO	NA	NA	NA	YES	NA	NA	NA	NO	98	67
TCGA-AD-6899-01	Internal_test	Low risk	Stage IIIC	MX	N2b	T4a	NA	MSS	176	DECEASED	176	Relapse-free	No	NA	NO	NA	Complete Remission/Response	NA	NA	NO	NA	TUMOR FREE	NO	YES	Complete Remission/Response	NA	NA	NA	62	84
TCGA-DM-A1D0-01	Internal_test	Low risk	Stage IIA	M0	N0	T3	NA	MSS	3974	LIVING	3974	Relapse-free	No	NA	NA	NA	NA	NA	NA	NO	NA	NA	NA	YES	NA	NA	NA	NO	65	79
TCGA-D5-5537-01	Internal_test	Low risk	Stage IIA	MX	N2	T3	RX	MSS	1381	DECEASED	722	Relapse	No	YES	NO	YES	Progressive Disease	NA	NO	YES	NO	WITH TUMOR	NO	YES	Complete Remission/Response	NA	NA	NO	75	83
TCGA-G4-6626-01	Internal_test	Low risk	Stage IIA	M0	N0	T3	R0	MSS	1422	DECEASED	1422	Relapse-free	No	NA	NO	NA	NA	NA	NA	NO	NO	TUMOR FREE	NO	YES	NA	NA	NA	NO	59	90
TCGA-DM-A1DB-01	Internal_test	Low risk	Stage IIA	M0	N0	T3	NA	MSS	1348	DECEASED	1348	Relapse-free	No	NA	NA	NA	NA	NA	NA	NO	NA	NA	NA	YES	NA	NA	NA	NO	75	68
TCGA-CA-5796-01	Internal_test	Low risk	Stage IIA	M0	N0	T3	R0	MSS	99	LIVING	99	Relapse-free	No	NA	NO	NA	NA	NA	NA	NO	NA	TUMOR FREE	NO	NO	NA	NA	NA	NA	NA	52
TCGA-CM-5349-01	Internal_test	Low risk	Stage IIA	M0	N0	T3	R0	MSS	335	LIVING	335	Relapse-free	No	NA	NO	NA	NA	NA	NA	NO	NO	TUMOR FREE	NO	YES	NA	NA	NA	NO	54.4	68
TCGA-DM-A282-01	Internal_test	Low risk	Stage IIA	M0	N0	T3	NA	MSS	4233	LIVING	4233	Relapse-free	No	NA	NA	NA	NA	NA	NA	NO	NA	NA	NA	YES	NA	NA	NA	NO	44	60
TCGA-G4-6306-01	Internal_test	Low risk	Stage IIA	M0	N0	T2	R0	MSS	1359	LIVING	1359	Relapse-free	No	NA	NO	NA	NA	NA	NA	NO	NO	TUMOR FREE	NO	YES	NA	NA	NA	NO	110	71
TCGA-AY-6386-01	Internal_test	Low risk	Stage IIIB	M0	N1a	T3	R0	MSS	360	LIVING	360	Relapse-free	No	NA	NO	NA	NA	NA	NA	NO	NO	TUMOR FREE	YES	YES	NA	NA	NA	NO	86	66
TCGA-AY-A71X-01	Internal_test	Low risk	Stage I	M0	N0	T2	R0	MSS	588	LIVING	588	Relapse-free	No	NA	NO	NA	Complete Remission/Response	NA	NA	NO	NO	TUMOR FREE	NO	YES	Complete Remission/Response	NA	NA	NO	130	54
TCGA-D5-6539-01	Internal_test	Low risk	Stage IIIA	M0	N0	T3	R0	MSS	380	LIVING	380	Relapse-free	No	NA	NO	NA	NA	NA	NA	NO	YES	TUMOR FREE	NO	YES	NA	NA	NA	NA	63	45
TCGA-D5-6931-01	Internal_test	Low risk	Stage IIIC	M0	N2	T4b	R0	MSS	365	LIVING	365	Relapse-free	No	NA	NO	NA	NA	NA	NA	NO	YES	TUMOR FREE	NO	YES	NA	NA	NA	NO	70	77
TCGA-AD-A5EK-01	Internal_test	Low risk	Stage I	MX	N0	T2	R0	MSS	500	LIVING	500	Relapse-free	No	NA	NO	NA	Complete Remission/Response	NA	NA	NO	NO	TUMOR FREE	NO	YES	Complete Remission/Response	NA	NA	NO	100	51
TCGA-DM-A28K-01	Internal_test	Low risk	Stage IIA	M0	N0	T3	NA	MSS	2988	LIVING	2988	Relapse-free	No	NA	NA	NA	NA	NA	NA	NO	NA	NA	NA	YES	NA	NA	NA	NO	78	75
TCGA-DM-A1D6-01	Internal_test	Low risk	Stage IIA	M0	N0	T3	NA	MSS	1518	DECEASED	1518	Relapse-free	No	NA	NA	NA	NA	NA	NA	NO	NA	NA	NA	YES	NA	NA	NA	NO	80	88
TCGA-D5-6923-01	Internal_test	Low risk	Stage I	M0	N0	T2	R0	MSS	378	LIVING	378	Relapse-free	No	NA	NO	NA	NA	NA	NA	NO	NO	TUMOR FREE	NO	YES	NA	NA	NA	NO	109	57
TCGA-DM-A28A-01	Internal_test	Low risk	Stage IIIC	M0	N2	T3	NA	MSS	805	DECEASED	805	Relapse-free	No	NA	NA	NA	NA	NA	NA	NO	NA	NA	NA	YES	NA	NA	NA	NO	72	78
TCGA-F4-6569-01	Internal_test	Low risk	Stage I	M0	N0	T2	R0	MSS	409	LIVING	409	Relapse-free	No	NA	NO	NA	NA	NA	NA	NO	NO	TUMOR FREE	YES	YES	NA	NA	NA	NO	60	60
TCGA-F4-6856-01	Internal_test	Low risk	Stage I	M0	N0	T2	R0	MSI-H	591	LIVING	591	Relapse-free	No	NA	NO	NA	Complete Remission/Response	NA	NA	NO	NO	TUMOR FREE	YES	YES	Complete Remission/Response	NA	NA	NO	61	45
TCGA-DM-A28F-01	Internal_test	Low risk	Stage IIIB	M0	N1	T3	NA	MSS	1094	DECEASED	1094	Relapse-free	No	NA	NA	NA	NA	NA	NA	NO	NA	NA	NA	YES	NA	NA	NA	NO	83	73
TCGA-DM-A1D4-01	Internal_test	Low risk	Stage IIA	M0	N0	T3	NA	MSI-L	2821	DECEASED	1920	Relapse	No	NA	NA	NO	NA	NA	NO	YES	NA	NA	NA	YES	NA	NA	NA	NO	59	80
TCGA-CM-6677-01	Internal_test	Low risk	Stage IIA	M0	N0	T3	R0	MSS	153	LIVING	153	Relapse-free	No	NA	NO	NA	NA	NA	NA	NO	NO	TUMOR FREE	NO	YES	NA	NA	NA	NO	99.5	75
TCGA-G4-6307-01	Internal_test	Low risk	Stage IIIB	M0	N1	T3	R0	MSS	1674	LIVING	1674	Relapse-free	No	NA	NO	NA	NA	NA	NA	NO	NO	TUMOR FREE	YES	YES	NA	NA	NA	NO	71	37
TCGA-D5-6540-01	Internal_test	Low risk	Stage I	M0	N0	T2	R0	MSI-H	491	LIVING	491	Relapse-free	No	NA	NO	NA	NA	NA	NA	NO	NO	TUMOR FREE	NO	YES	NA	NA	NA	NA	86	66
TCGA-DM-A28M-01	Internal_test	Low risk	Stage IIA	M0	N0	T3	NA	MSS	2895	LIVING	2895	Relapse-free	No	NA	NA	NA	NA	NA	NA	NO	NA	NA	NA	YES	NA	NA	NA	NO	90	63
TCGA-AA-3655-01	Internal_test	Low risk	Stage II	M0	N0	T3	R0	MSS	1856	LIVING	1856	Relapse-free	No	NA	NO	NA	Complete Remission/Response	NA	NA	NO	NA	TUMOR FREE	NO	YES	Complete Remission/Response	NA	NA	NO	NA	68
TCGA-AD-6964-01	Internal_test	Low risk	Stage II	NA	N2b	T4a	NA	MSI-H	331	DECEASED	325	Relapse	No	NO	NO	NO	Progressive Disease	Metastatic	YES	YES	NA	WITH TUMOR	YES	YES	Progressive Disease	RX	Other	NO	91	58
TCGA-DM-A280-01	Internal_test	Low risk	Stage IIA	M0	N0	T3	NA	MSS	236	DECEASED	236	Relapse-free	No	NA	NA	NA	NA	NA	NA	NO	NA	NA	NA	YES	NA	NA	NA	NO	63	70
TCGA-D5-6920-01	Internal_test	Low risk	Stage IIA	M0	N0	T3	R0	MSS	377	LIVING	377	Relapse-free	No	NA	NO	NA	NA	NA	NA	NO	NO	TUMOR FREE	NO	YES	NA	NA	NA	NO	73	77
TCGA-D5-6922-01	Internal_test	Low risk	Stage IIIA	M0	N1	T3	R0	MSS	308	LIVING	308	Relapse-free	No	NA	NO	NA	NA	NA	NA	NO	NO	TUMOR FREE	NO	YES	NA	NA	NA	NO	83	76
TCGA-AA-A01Z-01	Internal_test	Low risk	Stage II	M0	N0	T3	R0	MSS	1126	LIVING	1126	Relapse	No	NA	NO	NA	Progressive Disease	NA	NO	YES	NA	WITH TUMOR	NO	YES	Progressive Disease	NA	NA	NO	NA	68
TCGA-DM-A288-01	Internal_test	Low risk	Stage IIIC	M0	N2	T3	NA	MSS	427	DECEASED	320	Relapse	No	NA	NA	YES	NA	NA	NO	YES	NA	NA	NA	YES	NA	NA	NA	NO	85	68
TCGA-NH-A50V-01	Internal_test	Low risk	Stage IIIB	M0	N2a	T3	R0	MSI-L	588	LIVING	588	Relapse-free	No	NA	NO	NA	Complete Remission/Response	NA	NA	NO	NO	TUMOR FREE	YES	YES	Complete Remission/Response	NA	NA	NO	65.9	69
TCGA-DM-A28G-01	Internal_test	Low risk	Stage IIA	M0	N0	T3	NA	MSS	1849	DECEASED	1849	Relapse-free	No	NA	NA	NA	NA	NA	NA	NO	NA	NA	NA	YES	NA	NA	NA	NO	90	75
TCGA-DM-A28H-01	Internal_test	Low risk	Stage IIIC	M0	N2	T3	NA	MSI-L	3561	LIVING	484	Relapse	No	NA	NA	YES	NA	Locoregional Disease	YES	YES	NA	NA	NA	YES	NA	NA	NA	NO	87	50
TCGA-DM-A1HA-01	Internal_test	Low risk	Stage IIIC	M0	N2	T3	NA	MSS	4000	LIVING	4000	Relapse-free	No	NA	NA	NA	NA	NA	NA	NO	NA	NA	NA	YES	NA	NA	NA	NO	67	82
TCGA-F4-6854-01	Internal_test	Low risk	Stage IIA	M0	N0	T3	R0	MSS	16	LIVING	16	Relapse-free	No	NA	NO	NA	Complete Remission/Response	NA	NA	NO	NO	TUMOR FREE	NO	YES	Complete Remission/Response	NA	NA	NO	66	77
TCGA-4N-A93T-01	Internal_test	Low risk	Stage IIIB	M0	N1b	T4a	R0	MSS	146	LIVING	146	Relapse-free	No	NA	NO	NA	Stable Disease	NA	NA	NO	NO	WITH TUMOR	YES	YES	Stable Disease	NA	NA	YES	134	67
TCGA-AZ-4315-01	Internal_test	Low risk	Stage IIA	M0	N0	T3	R0	MSS	1776	LIVING	1776	Relapse-free	No	NA	NO	NA	NA	NA	NA	NO	NO	TUMOR FREE	NO	YES	NA	NA	NA	NA	84	61
TCGA-AA-A01P-01	Internal_test	Low risk	Stage III	M0	N1	T3	R0	MSI-H	1158	DECEASED	762	Relapse	No	NA	NO	NA	NA	NA	NO	YES	NA	WITH TUMOR	NO	YES	NA	NA	NA	NO	NA	80
TCGA-AZ-6598-01	Internal_test	Low risk	Stage II	MX	N0	T3	NA	MSI-H	1503	DECEASED	1503	Relapse-free	No	NA	NO	NA	Complete Remission/Response	NA	NA	NO	NO	TUMOR FREE	NO	YES	Complete Remission/Response	NA	NA	NA	NA	77
TCGA-G4-6293-01	Internal_test	Low risk	Stage III	M0	N1	T3	R0	MSI-L	3275	LIVING	3275	Relapse-free	No	NA	NO	NA	NA	NA	NA	NO	NO	TUMOR FREE	YES	YES	NA	NA	NA	NO	64.5	49
TCGA-G4-6321-01	Internal_test	Low risk	Stage III	MX	N1	T2	R0	MSI-L	672	LIVING	672	Relapse-free	No	NA	NO	NA	NA	NA	NA	NO	NO	TUMOR FREE	YES	YES	NA	NA	NA	NO	100	60
TCGA-AA-3685-01	Internal_test	Low risk	Stage II	M0	N0	T3	R0	MSS	1127	LIVING	1127	Relapse-free	No	NA	NO	NA	Complete Remission/Response	NA	NA	NO	NA	TUMOR FREE	NO	YES	Complete Remission/Response	NA	NA	NO	NA	69
TCGA-CK-6747-01	Internal_test	Low risk	Stage IIA	MX	N0	T3	RX	MSI-H	89	LIVING	89	Relapse-free	No	NA	NO	NA	NA	NA	NA	NO	NO	TUMOR FREE	NO	NA	NA	NA	NA	NO	NA	87
TCGA-AA-3713-01	Internal_test	Low risk	Stage IV	M1	N0	T3	R2	MSI-H	579	LIVING	579	Relapse-free	No	NA	YES	NA	Partial Remission/Response	NA	NA	NO	NA	TUMOR FREE	YES	YES	Partial Remission/Response	NA	NA	YES	NA	68
TCGA-AD-6963-01	Internal_test	Low risk	Stage II	MX	N0	T3	NA	MSS	834	LIVING	834	Relapse-free	No	NA	NO	NA	Complete Remission/Response	NA	NA	NO	NA	TUMOR FREE	NO	YES	Complete Remission/Response	NA	NA	NA	107	58
TCGA-G4-6628-01	Internal_test	Low risk	Stage I	M0	N0	T2	R0	MSI-H	1595	LIVING	1595	Relapse-free	No	NA	NO	NA	NA	NA	NA	NO	NO	TUMOR FREE	NO	YES	NA	NA	NA	NO	91	78
TCGA-AA-3675-01	Internal_test	Low risk	Stage II	M0	N0	T3	R0	MSS	1431	LIVING	1431	Relapse-free	No	NA	NO	NA	Complete Remission/Response	NA	NA	NO	NA	TUMOR FREE	NO	YES	Complete Remission/Response	NA	NA	NO	NA	84
TCGA-D5-5541-01	Internal_test	Low risk	Stage IIIB	M0	N1a	T3	R0	MSS	350	LIVING	350	Relapse-free	No	NA	NO	NA	NA	NA	NA	NO	NO	TUMOR FREE	YES	YES	NA	NA	NA	NO	81	63
TCGA-AZ-6606-01	Internal_test	Low risk	Stage IV	M1	N2	T4	NA	MSS	357	DECEASED	357	Relapse-free	No	NA	NO	NA	Progressive Disease	NA	NA	NO	YES	WITH TUMOR	YES	YES	Progressive Disease	NA	NA	NA	NA	81
TCGA-DM-A1HB-01	Internal_test	Low risk	Stage IIIB	M0	N1	T3	NA	MSI-H	4126	LIVING	4126	Relapse-free	No	NA	NA	NA	NA	NA	NA	NO	NA	NA	NA	YES	NA	NA	NA	NO	70	75
TCGA-NH-A5IV-01	Internal_test	Low risk	Stage IIA	MX	N0	T3	R0	MSI-H	588	LIVING	588	Relapse-free	No	NA	NO	NA	NA	NA	NA	NO	NO	TUMOR FREE	NO	YES	Complete Remission/Response	NA	NA	NO	49.5	90
TCGA-G4-6322-01	Internal_test	Low risk	Stage IIIB	MX	N1	T3	R0	MSI-L	792	LIVING	789	Relapse	No	NO	NO	NO	NA	NA	NO	YES	NO	WITH TUMOR	YES	YES	NA	NA	NA	NA	90.9	65
TCGA-AZ-6601-01	Internal_test	Low risk	Stage II	M0	N0	T3	NA	MSI-H	3042	DECEASED	2270	Relapse	No	NO	NO	NO	Progressive Disease	Locoregional Disease	YES	YES	YES	WITH TUMOR	NO	YES	Progressive Disease	R0	NA	NA	59	68
TCGA-G4-6314-01	Internal_test	Low risk	Stage IV	M1	N2	T3	R0	MSS	1093	LIVING	38	Relapse	No	YES	NO	YES	NA	NA	NO	YES	NO	WITH TUMOR	YES	YES	NA	NA	NA	NO	84.1	76
TCGA-A6-5659-01	Internal_test	Low risk	Stage I	M0	N0	T2	R0	MSS	286	LIVING	286	Relapse-free	No	NA	NO	NA	NA	NA	NA	NO	NA	TUMOR FREE	NO	YES	NA	NA	NA	NO	117.1	82
TCGA-QG-A5YV-01	Internal_test	Low risk	Stage IIIC	MX	N1a	T4b	R0	MSS	1301	LIVING	1301	Relapse-free	No	NA	NO	NA	Complete Remission/Response	NA	NA	NO	NO	TUMOR FREE	YES	YES	Complete Remission/Response	NA	NA	NO	109.226	64
TCGA-G4-6586-01	Internal_test	Low risk	Stage IIA	M0	N0	T3	R0	MSI-H	1089	LIVING	1089	Relapse-free	No	NA	NO	NA	NA	NA	NA	NO	NO	TUMOR FREE	NO	YES	NA	NA	NA	NO	63.2	73
TCGA-QG-A5YX-01	Internal_test	Low risk	Stage IIA	MX	N0	T3	R0	MSI-L	1003	LIVING	1003	Relapse-free	No	NA	NO	NA	Complete Remission/Response	NA	NA	NO	NO	TUMOR FREE	YES	YES	Complete Remission/Response	NA	NA	NO	68.49	61
TCGA-AA-3492-01	Internal_test	Low risk	Stage II	M0	N0	T3	R0	MSI-H	92	DECEASED	92	Relapse-free	No	NA	NO	NA	NA	NA	NA	NO	NA	TUMOR FREE	NO	YES	NA	NA	NA	YES	NA	90
TCGA-AZ-4682-01	Internal_test	Low risk	Stage IVA	M1	N0	T3	R0	MSS	680	DECEASED	680	Relapse-free	No	NA	NO	NA	NA	NA	NA	NO	NA	WITH TUMOR	YES	YES	NA	NA	NA	YES	98	61
TCGA-AY-A54L-01	Internal_test	Low risk	Stage I	M0	N0	T2	R0	MSI-L	525	LIVING	396	Relapse	No	YES	NO	NO	Partial Remission/Response	NA	NO	YES	NO	WITH TUMOR	NO	YES	Complete Remission/Response	NA	NA	NO	68	74
TCGA-G4-6299-01	Training	Low risk	Stage IIIC	M0	N2	T3	R0	MSS	2268	LIVING	2268	Relapse-free	No	NA	NO	NA	NA	NA	NA	NO	NO	TUMOR FREE	YES	YES	NA	NA	NA	NO	88	69
TCGA-CM-6680-01	Training	Low risk	Stage IIIB	M0	N2a	T3	R0	MSS	91	LIVING	91	Relapse-free	No	NA	NO	NA	NA	NA	NA	NO	NO	TUMOR FREE	NO	YES	NA	NA	NA	NO	72.4	78
TCGA-CM-6675-01	Training	Low risk	Stage IVB	M1b	N2b	T3	R0	MSS	153	LIVING	153	Relapse-free	No	YES	NO	NO	NA	NA	NO	NO	YES	TUMOR FREE	YES	YES	NA	NA	NA	NO	93.9	35
TCGA-CM-6674-01	Training	Low risk	Stage IIA	M0	N0	T3	R0	MSI-H	150	LIVING	150	Relapse-free	No	NA	NO	NA	NA	NA	NA	NO	NO	TUMOR FREE	NO	YES	NA	NA	NA	NO	80.7	39
TCGA-F4-6805-01	Training	Low risk	Stage IIA	M0	N0	T3	R0	MSS	496	LIVING	496	Relapse-free	No	NA	NO	NA	Complete Remission/Response	NA	NA	NO	NO	TUMOR FREE	YES	NO	Complete Remission/Response	NA	NA	NO	60	58
TCGA-DM-A0X9-01	Training	Low risk	Stage IIA	M0	N0	T3	NA	MSS	3641	LIVING	3641	Relapse-free	No	NA	NA	NA	NA	NA	NA	NO	NA	NA	NA	YES	NA	NA	NA	NO	86	71
TCGA-G4-6309-01	Training	Low risk	Stage IIIB	M0	N1	T3	R0	MSI-H	1574	LIVING	1574	Relapse-free	No	NA	NO	NA	NA	NA	NA	NO	NO	TUMOR FREE	YES	YES	NA	NA	NA	NO	65.4	40
TCGA-AZ-4616-01	Training	Low risk	Stage IV	M1	N2	T3	NA	MSI-L	156	DECEASED	156	Relapse-free	No	NA	NO	NA	NA	NA	NA	NO	YES	WITH TUMOR	YES	YES	NA	NA	NA	NA	NA	82
TCGA-A6-6653-01	Training	Low risk	Stage I	M0	N0	T2	NA	MSI-H	282	LIVING	282	Relapse-free	No	NA	NO	NA	NA	NA	NA	NO	NA	TUMOR FREE	NO	YES	NA	NA	NA	NO	98.3	82
TCGA-F4-6570-01	Training	Low risk	Stage IIA	M0	N0	T3	R0	MSI-H	188	DECEASED	188	Relapse-free	No	NA	NO	NA	NA	NA	NA	NO	NO	TUMOR FREE	NO	YES	NA	NA	NA	NO	59	78
TCGA-CA-5254-01	Training	Low risk	Stage IIA	M0	N0	T3	RX	MSI-L	68	LIVING	68	Relapse-free	No	NA	NO	NA	NA	NA	NA	NO	NA	TUMOR FREE	NO	NO	NA	NA	NA	NA	55	42
TCGA-D5-6926-01	Training	Low risk	Stage IIIA	M0	N1	T4a	R0	MSS	275	LIVING	275	Relapse-free	No	NA	YES	NA	NA	NA	NA	NO	NO	TUMOR FREE	YES	YES	NA	NA	NA	NA	82	65
TCGA-CM-5868-01	Training	Low risk	Stage IVA	M1a	N1a	T4a	R0	MSS	426	LIVING	426	Relapse-free	No	NA	NO	NA	NA	NA	NA	NO	YES	WITH TUMOR	YES	YES	NA	NA	NA	NO	99.8	59
TCGA-CK-6751-01	Training	Low risk	Stage I	MX	N0	T2	RX	MSS	3780	LIVING	3780	Relapse-free	No	NA	NO	NA	NA	NA	NA	NO	NO	TUMOR FREE	NO	NA	NA	NA	NA	NO	NA	88
TCGA-G4-6295-01	Training	Low risk	Stage II	M0	N0	T3	NA	MSI-L	254	LIVING	254	Relapse-free	No	NA	NO	NA	NA	NA	NA	NO	NO	TUMOR FREE	NO	YES	NA	NA	NA	NO	59	70
TCGA-CM-4751-01	Training	Low risk	Stage IIIB	M0	N1b	T3	R0	MSS	607	LIVING	607	Relapse-free	No	NA	NO	NA	NA	NA	NA	NO	YES	TUMOR FREE	YES	YES	NA	NA	NA	NO	115	62
TCGA-D5-6927-01	Training	Low risk	Stage IIA	M0	N0	T3	R0	MSI-H	287	LIVING	287	Relapse-free	No	NA	NO	NA	NA	NA	NA	NO	NO	TUMOR FREE	NO	YES	NA	NA	NA	NO	76	34
TCGA-DM-A28C-01	Training	Low risk	Stage IIA	M0	N0	T3	NA	MSS	2475	DECEASED	1929	Relapse	No	NA	NA	NO	NA	NA	NO	YES	NA	NA	NA	YES	NA	NA	NA	NO	70	74
TCGA-A6-5665-01	Training	Low risk	Stage IIA	M0	N0	T3	R0	MSI-H	404	LIVING	404	Relapse-free	No	NO	NO	NO	NA	NA	NO	NO	NA	TUMOR FREE	NO	YES	NA	NA	NA	NO	90.8	84
TCGA-DM-A1D8-01	Training	Low risk	Stage II	NA	N1	T3	NA	MSS	383	DECEASED	383	Relapse-free	No	NA	NA	NA	NA	NA	NA	NO	NA	NA	NA	YES	NA	NA	NA	NO	65	50
TCGA-A6-6138-01	Training	Low risk	Stage I	M0	N0	T2	NA	MSS	280	LIVING	280	Relapse-free	No	NA	NO	NA	NA	NA	NA	NO	NA	TUMOR FREE	NO	YES	NA	NA	NA	NO	90.7	61
TCGA-AA-3660-01	Training	Low risk	Stage II	M0	N0	T3	R0	MSS	2375	LIVING	2375	Relapse-free	No	NA	NO	NA	Complete Remission/Response	NA	NA	NO	NA	TUMOR FREE	NO	YES	Complete Remission/Response	NA	NA	NO	NA	51
TCGA-CM-4747-01	Training	Low risk	Stage IVA	M1a	N1b	T4a	R0	MSI-L	244	LIVING	244	Relapse-free	No	NO	NO	NO	NA	Metastatic	YES	NO	YES	TUMOR FREE	YES	YES	NA	R0	Liver	NO	76.7	47
TCGA-AA-A02Y-01	Training	Low risk	Stage I	M0	N0	T2	R0	MSS	1216	LIVING	1216	Relapse-free	No	NA	NO	NA	Complete Remission/Response	NA	NA	NO	NA	TUMOR FREE	NO	YES	Complete Remission/Response	NA	NA	NO	NA	73
TCGA-AZ-4614-01	Training	Low risk	Stage IVA	M1	N1	T4a	R0	MSI-L	172	DECEASED	172	Relapse-free	No	NA	NO	NA	NA	NA	NA	NO	NO	WITH TUMOR	NO	YES	NA	NA	NA	NA	70	71
TCGA-G4-6320-01	Training	Low risk	Stage III	MX	N1	T3	R0	MSI-H	804	LIVING	804	Relapse-free	No	NA	NO	NA	NA	NA	NA	NO	NO	TUMOR FREE	YES	YES	NA	NA	NA	NO	139.7	73
TCGA-G4-6315-01	Training	Low risk	Stage IV	M1	N1	T3	R0	MSS	1117	LIVING	1117	Relapse-free	No	NA	NO	NA	NA	NA	NA	NO	YES	TUMOR FREE	YES	YES	NA	NA	NA	NO	58	66
TCGA-G4-6625-01	Training	Low risk	Stage IIA	M0	N0	T3	R0	MSS	2792	LIVING	2564	Relapse	No	NO	NO	YES	NA	NA	NO	YES	NO	TUMOR FREE	NO	YES	NA	NA	NA	NO	65.5	77
TCGA-A6-5656-01	Training	Low risk	Stage I	M0	N0	T2	NA	MSS	462	LIVING	462	Relapse-free	No	NA	NO	NA	NA	NA	NA	NO	NA	TUMOR FREE	NO	YES	NA	NA	NA	NO	76.6	74
TCGA-G4-6304-01	Training	Low risk	Stage IIB	M0	N0	T4	R0	MSI-H	1631	LIVING	859	Relapse	No	YES	NO	YES	NA	NA	NO	YES	NO	TUMOR FREE	YES	NO	NA	NA	NA	NO	57	66
TCGA-AZ-6599-01	Training	Low risk	Stage I	MX	N0	T2	NA	MSS	206	DECEASED	206	Relapse-free	No	NA	NO	NA	Complete Remission/Response	NA	NA	NO	NO	TUMOR FREE	NO	YES	Complete Remission/Response	NA	NA	NA	NA	72
TCGA-CM-6164-01	Training	Low risk	Stage IIA	M0	N0	T3	R0	MSS	487	LIVING	487	Relapse-free	No	NA	NO	NA	NA	NA	NA	NO	YES	TUMOR FREE	NO	YES	NA	NA	NA	NO	59	46
TCGA-A6-6140-01	Training	Low risk	Stage IIA	M0	N0	T3	NA	MSS	356	LIVING	356	Relapse-free	No	NA	NO	NA	NA	NA	NA	NO	NA	TUMOR FREE	YES	YES	NA	NA	NA	NO	78.9	62
TCGA-AA-3526-01	Training	Low risk	Stage I	M0	N0	T2	R0	MSI-L	580	LIVING	580	Relapse-free	No	NA	NO	NA	Complete Remission/Response	NA	NA	NO	NA	TUMOR FREE	NO	YES	Complete Remission/Response	NA	NA	NO	NA	57
TCGA-G4-6311-01	Training	Low risk	Stage III	MX	N1	T3	R0	MSS	1199	LIVING	1199	Relapse-free	No	NA	NO	NA	NA	NA	NA	NO	YES	TUMOR FREE	YES	YES	NA	NA	NA	NO	69.9	80
TCGA-A6-2675-01	Training	Low risk	Stage IIA	MX	N0	T3	R0	NA	846	LIVING	846	Relapse-free	No	NA	NO	NA	NA	NA	NA	NO	NA	TUMOR FREE	NO	YES	NA	NA	NA	NO	71.3	78
TCGA-A6-6648-01	Training	Low risk	Stage IVA	M1a	N0	T3	NA	MSS	344	LIVING	344	Relapse-free	No	YES	NO	NO	NA	NA	NO	NO	NA	TUMOR FREE	YES	YES	NA	NA	NA	NO	87	56
TCGA-A6-6781-01	Training	Low risk	Stage IIIC	MX	N1b	T4b	R0	MSI-H	293	LIVING	293	Relapse-free	No	NA	NO	NA	NA	NA	NA	NO	NA	TUMOR FREE	YES	YES	NA	NA	NA	NO	87.5	43
TCGA-CM-4744-01	Training	Low risk	Stage I	M0	N0	T2	R0	MSS	214	LIVING	214	Relapse-free	No	NA	NO	NA	NA	NA	NA	NO	NO	TUMOR FREE	NO	YES	NA	NA	NA	NO	89.7	69
TCGA-G4-6588-01	Training	Low risk	Stage IIA	M0	N0	T3	R0	MSI-H	796	LIVING	796	Relapse-free	No	NA	NO	NA	NA	NA	NA	NO	NO	TUMOR FREE	NO	NO	NA	NA	NA	NO	57	58
TCGA-4T-AA8H-01	Training	Low risk	Stage IIA	MX	N0	T3	R0	Indeterminate	349	LIVING	349	Relapse-free	No	NA	NO	NA	Complete Remission/Response	NA	NA	NO	NO	TUMOR FREE	NO	YES	Complete Remission/Response	NA	NA	NO	107.956	42
TCGA-F4-6855-01	Training	Low risk	Stage IIA	M0	N0	T3	R0	MSI-L	1077	LIVING	1077	Relapse-free	No	NA	NO	NA	Complete Remission/Response	NA	NA	NO	NO	TUMOR FREE	NO	YES	Complete Remission/Response	NA	NA	NO	80	70
TCGA-CA-5797-01	Training	Low risk	Stage IIA	M0	N0	T3	R0	MSS	100	LIVING	100	Relapse-free	No	NA	NO	NA	NA	NA	NA	NO	NA	TUMOR FREE	NO	NO	NA	NA	NA	NA	NA	56
TCGA-AZ-6608-01	Training	Low risk	Stage IIIA	M0	N1	T2	NA	MSI-L	49	DECEASED	49	Relapse-free	No	NA	NO	NA	Progressive Disease	NA	NA	NO	NO	WITH TUMOR	NO	YES	Progressive Disease	NA	NA	NA	NA	55
TCGA-A6-6141-01	Training	Low risk	Stage IIA	M0	N0	T3	NA	MSS	255	LIVING	255	Relapse-free	No	NA	NO	NA	NA	NA	NA	NO	NA	TUMOR FREE	YES	YES	NA	NA	NA	NO	96.8	31
TCGA-D5-6531-01	Training	Low risk	Stage IIA	M0	N0	T3	R0	MSS	540	LIVING	540	Relapse-free	No	NA	NO	NA	NA	NA	NA	NO	NO	TUMOR FREE	NO	YES	NA	NA	NA	NA	60	75
TCGA-CA-5255-01	Training	Low risk	Stage IIA	M0	N0	T3	RX	MSS	93	LIVING	93	Relapse-free	No	NA	YES	NA	NA	NA	NA	NO	NA	TUMOR FREE	NO	NO	NA	NA	NA	NA	56	45
TCGA-A6-5660-01	Training	Low risk	Stage IIIC	M0	N2b	T3	NA	MSS	342	LIVING	342	Relapse-free	No	NA	NO	NA	NA	NA	NA	NO	NA	TUMOR FREE	YES	YES	NA	NA	NA	NO	94.4	73
TCGA-G4-6310-01	Training	Low risk	Stage IIIB	M0	N1	T3	R0	MSS	1372	LIVING	1372	Relapse-free	No	NA	YES	NA	NA	NA	NA	NO	NO	TUMOR FREE	YES	YES	NA	NA	NA	YES	102.5	69
TCGA-AZ-4313-01	Training	Low risk	Stage I	M0	N0	T1	NA	MSI-H	1532	LIVING	1532	Relapse-free	No	NA	NO	NA	NA	NA	NA	NO	NO	TUMOR FREE	NO	YES	NA	NA	NA	NA	57	51
TCGA-AD-6901-01	Training	Low risk	Stage II	MX	N0	T3	NA	MSI-L	682	DECEASED	468	Relapse	No	NO	NO	YES	Progressive Disease	Metastatic	YES	YES	NA	WITH TUMOR	YES	YES	Complete Remission/Response	RX	Other	NO	69	78
TCGA-DM-A28E-01	Training	Low risk	Stage IIA	M0	N0	T3	NA	MSS	3648	LIVING	3648	Relapse-free	No	NA	NA	NA	NA	NA	NA	NO	NA	NA	NA	YES	NA	NA	NA	NO	75	72
TCGA-CM-4743-01	Training	Low risk	Stage IIA	M0	N0	T3	R0	MSI-H	184	LIVING	184	Relapse-free	No	NA	NO	NA	NA	NA	NA	NO	NO	TUMOR FREE	YES	YES	NA	NA	NA	NO	84.4	69
TCGA-F4-6809-01	Training	Low risk	Stage IVA	M1	N1	T3	R0	MSS	403	DECEASED	403	Relapse-free	No	NA	NO	NA	NA	NA	NA	NO	NO	WITH TUMOR	NO	YES	NA	NA	NA	NO	88	52
TCGA-CM-6679-01	Training	Low risk	Stage IIA	M0	N0	T3	R0	MSS	122	LIVING	122	Relapse-free	No	NA	NO	NA	NA	NA	NA	NO	NO	TUMOR FREE	NO	YES	NA	NA	NA	NO	106.5	58
TCGA-CK-5912-01	Training	Low risk	Stage I	MX	N0	T2	RX	MSS	1493	DECEASED	1493	Relapse-free	No	NA	NO	NA	NA	NA	NA	NO	NO	TUMOR FREE	NO	NA	Complete Remission/Response	NA	NA	NO	NA	81
TCGA-F4-6808-01	Training	Low risk	Stage I	M0	N0	T1	R0	MSS	1024	LIVING	1024	Relapse-free	No	NA	NO	NA	Complete Remission/Response	NA	NA	NO	NO	TUMOR FREE	NO	YES	Complete Remission/Response	NA	NA	NO	70	54
TCGA-G4-6317-01	Training	Low risk	Stage IIIC	MX	N2	T3	R0	MSI-L	1095	LIVING	592	Relapse	No	NO	NO	NO	NA	Metastatic	YES	YES	NO	TUMOR FREE	YES	YES	NA	NA	Liver	NO	95.3	51
TCGA-DM-A1DA-01	Training	Low risk	Stage IIIC	M0	N2	T3	NA	MSI-L	228	DECEASED	228	Relapse-free	No	NA	NA	NA	NA	NA	NA	NO	NA	NA	NA	YES	NA	NA	NA	NO	62	71
TCGA-D5-6898-01	Training	Low risk	Stage I	M0	N0	T2	R0	MSS	229	LIVING	229	Relapse-free	No	NA	NO	NA	NA	NA	NA	NO	NO	TUMOR FREE	NO	YES	NA	NA	NA	NO	100	51
TCGA-NH-A8F7-01	Training	Low risk	Stage IIA	MX	N0	T3	R0	Indeterminate	397	LIVING	397	Relapse-free	No	NA	NO	NA	NA	NA	NA	NO	NO	WITH TUMOR	YES	YES	Partial Remission/Response	NA	NA	YES	175.3	53
